# Supplementary material for: Phosphorylation of DGCR8 Increases Its Intracellular Stability and Induces a Progrowth miRNA Profile
Source: PubMed Central journal article supplement (PMC3892995; doi:10.1016/j.celrep.2013.10.017), 2013-11-14

# pSer35

Protein: Q8WYQ5-1; Q8WYQ5; Q53GY5; Q8WYQ5-3; Q8WYQ5; Q8WYQ5-2; Q8WYQ5; C9JSD5  
 Score: 88.29  
 Source: OT11-1423  
 Scannumber: 7475  
 Method: ITMS; CID; 2

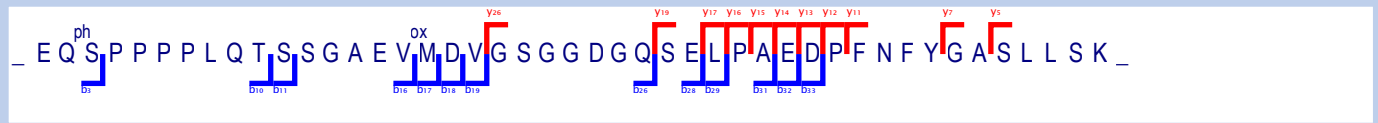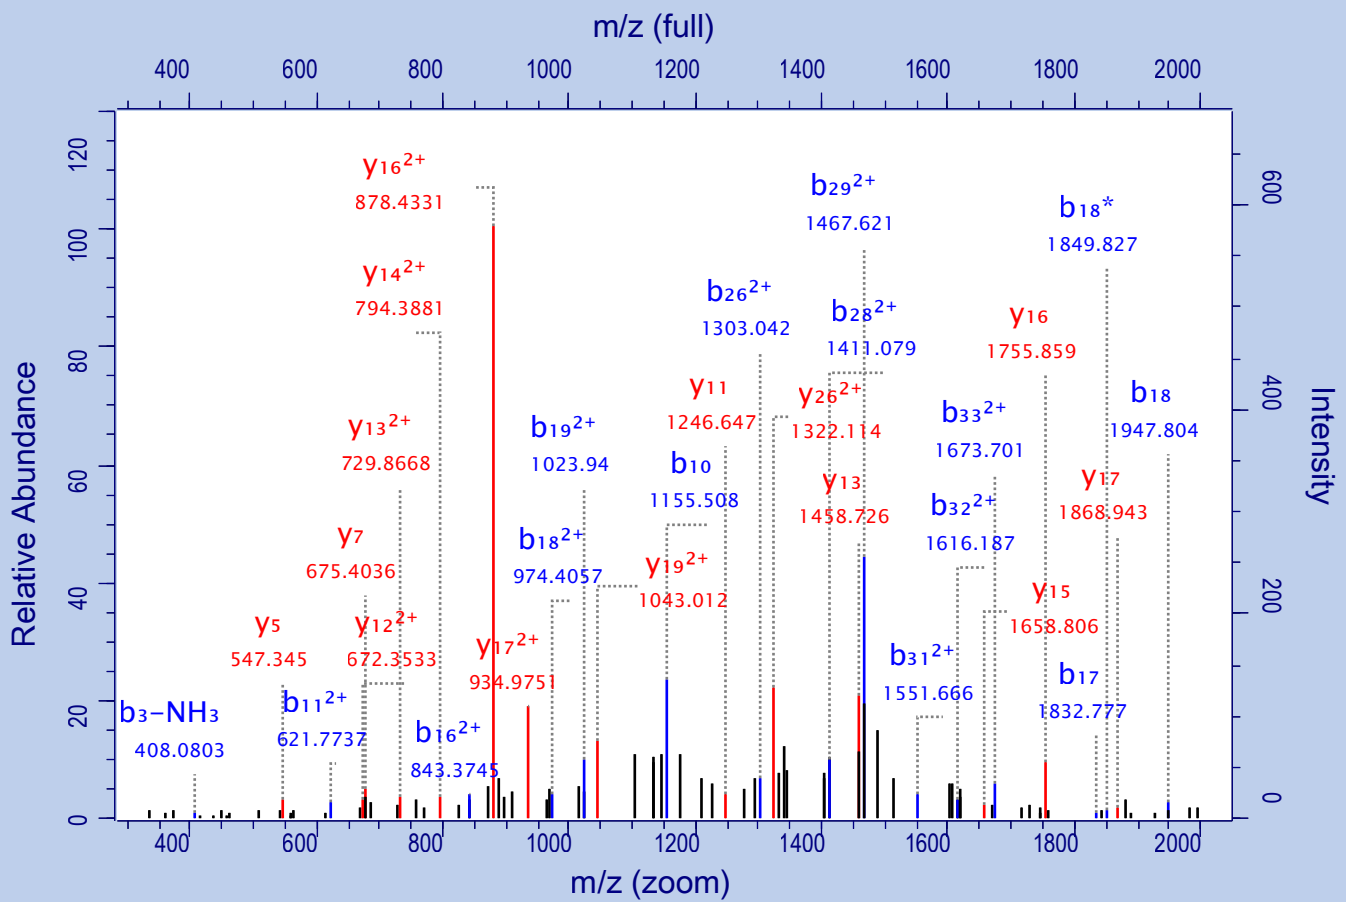

# pSer35

Protein: Q8WYQ5-1; Q8WYQ5; Q53GY5; Q8WYQ5-3; Q8WYQ5; Q8WYQ5-2; Q8WYQ5; C9JSD5  
 Score: 112.75  
 Source: OT10-0371\_TiO2EI  
 Scannumber: 4503  
 Method: ITMS; CID; 2

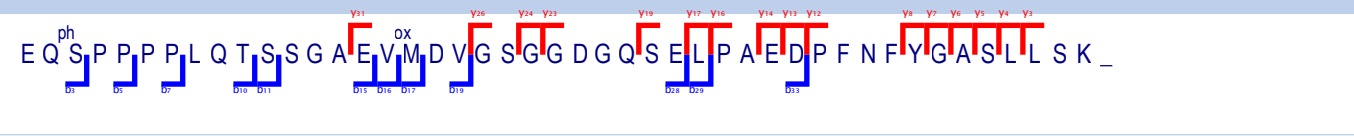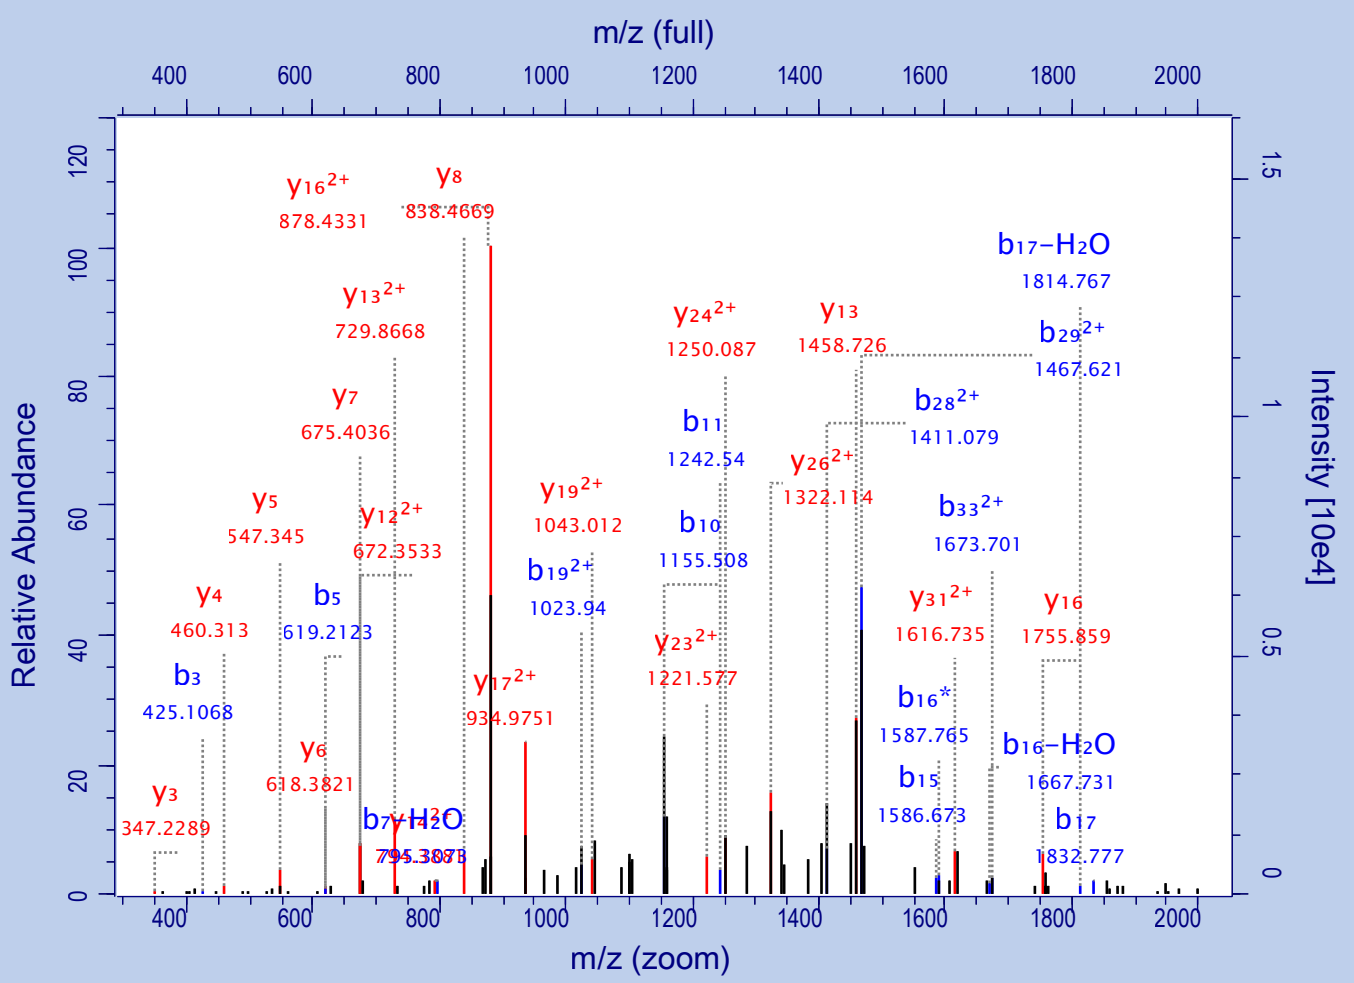

# pT42

Protein: Q8WYQ5-1; Q8WYQ5; Q53GY5; Q8WYQ5-3; Q8WYQ5; Q8WYQ5-2; Q8WYQ5; C9JSD5  
 Score: 158.24  
 Source: OT10-0371\_TiO2EI  
 Scannumber: 4607  
 Method: ITMS; CID; 2

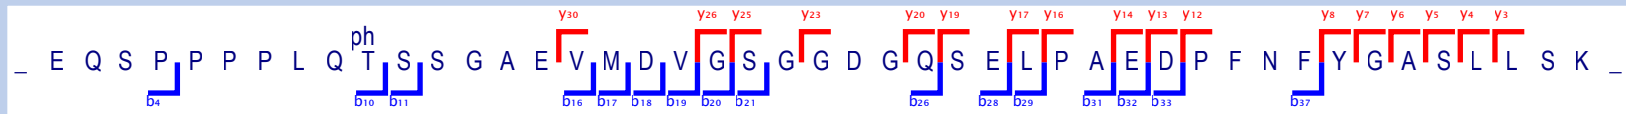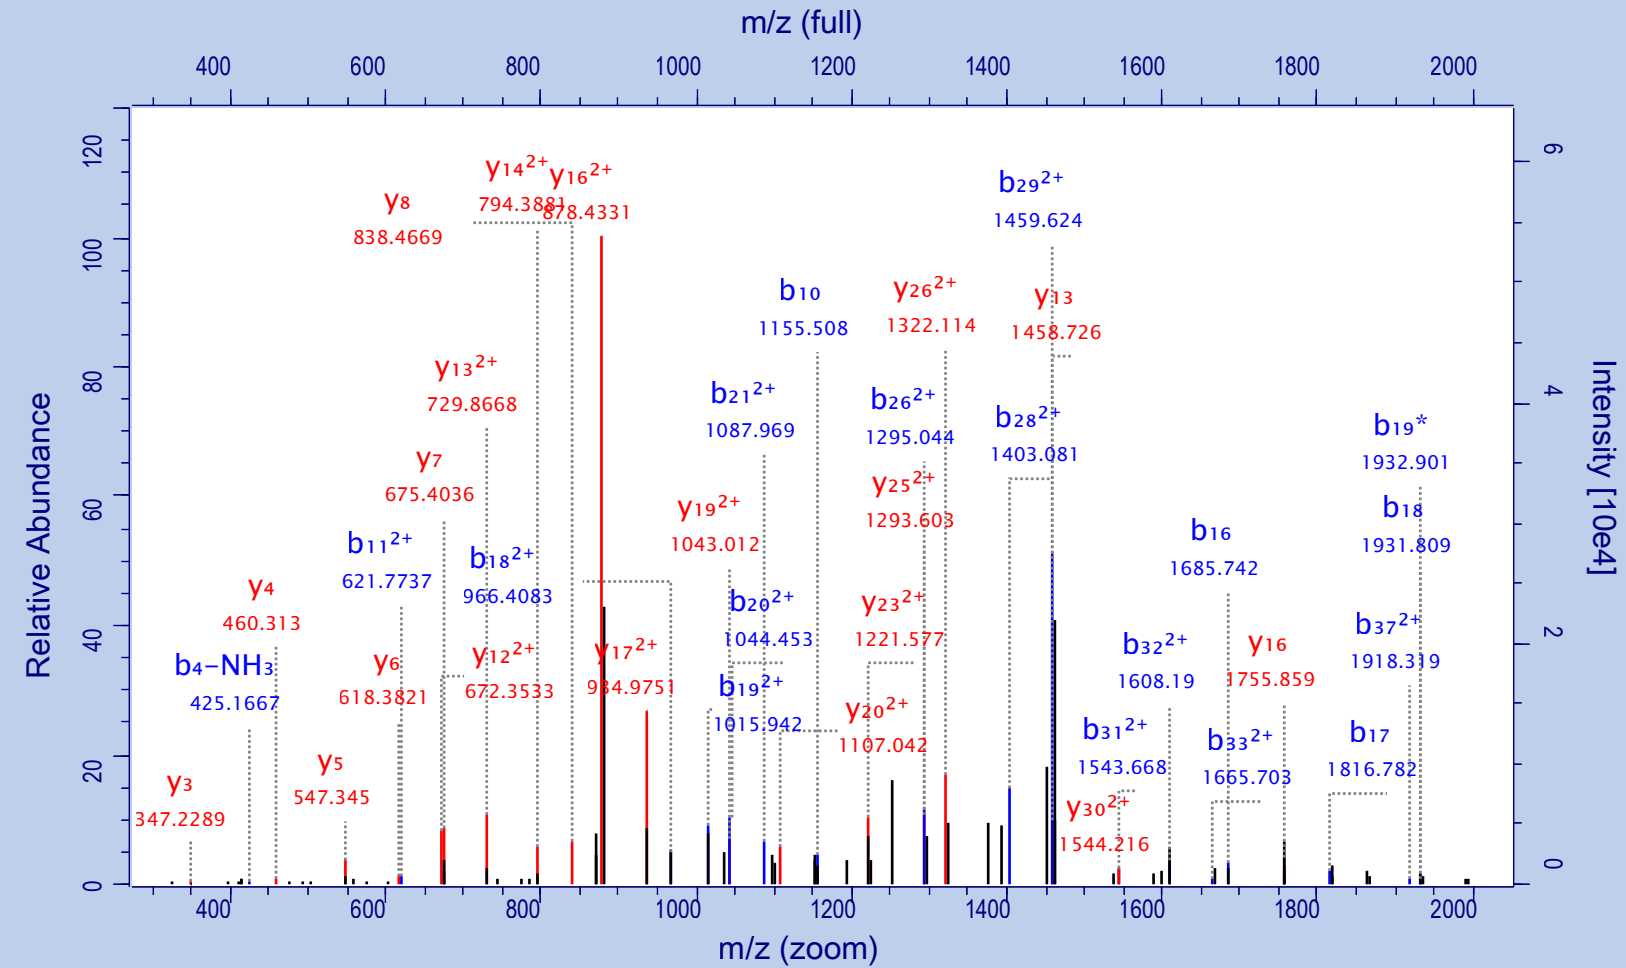

# pSer35 and pSer59

Protein: Q8WYQ5-1; Q8WYQ5; Q53GY5; Q8WYQ5-3; Q8WYQ5; Q8WYQ5-2; Q8WYQ5; C9JSD5  
 Score: 83.43  
 Source: OT10-0371\_TiO2EI  
 Scannumber: 4651  
 Method: ITMS; CID; 2

\_ E Q S P P P P L Q T S S G A E V M D V G S G G D G Q S E L P A E D P F N F Y G A S L L S K \_  
 (Fragmentation sites indicated by blue and red brackets below the sequence)

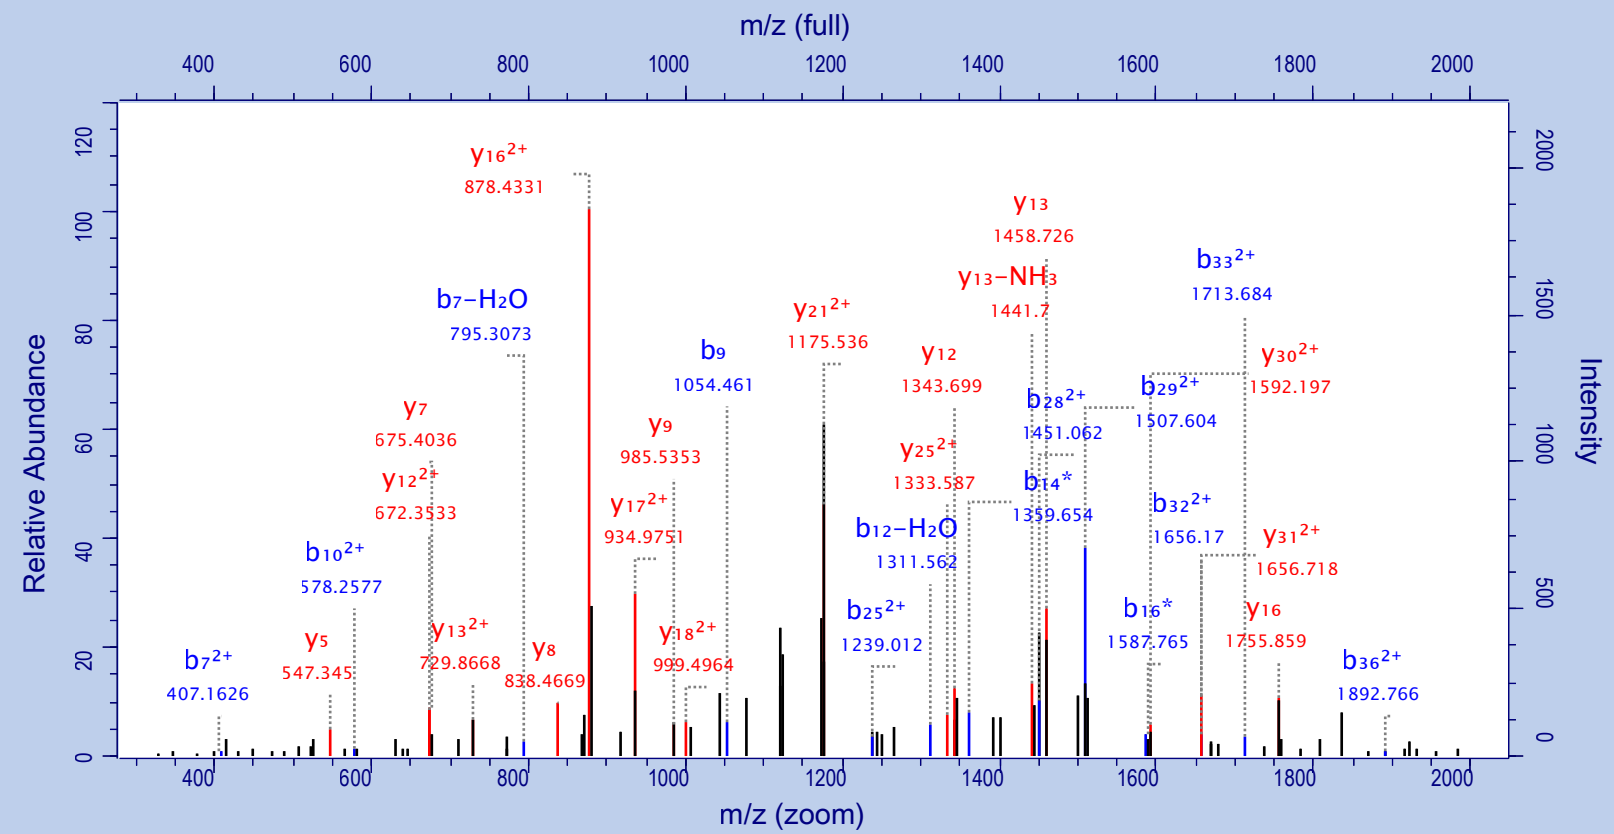

# pS92

Protein: Q8WYQ5-1; Q8WYQ5; Q53GY5; Q8WYQ5-3; Q8WYQ5; Q8WYQ5-2; Q8WYQ5; C9JSD5  
Score: 25.64  
Source: OT10-0371\_TiO2EI  
Scannumber: 2959  
Method: ITMS; CID; 2

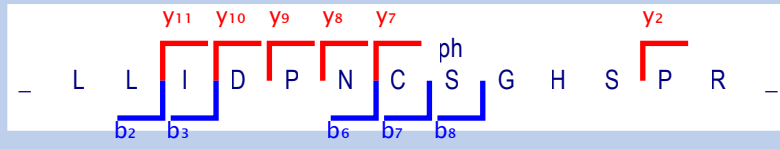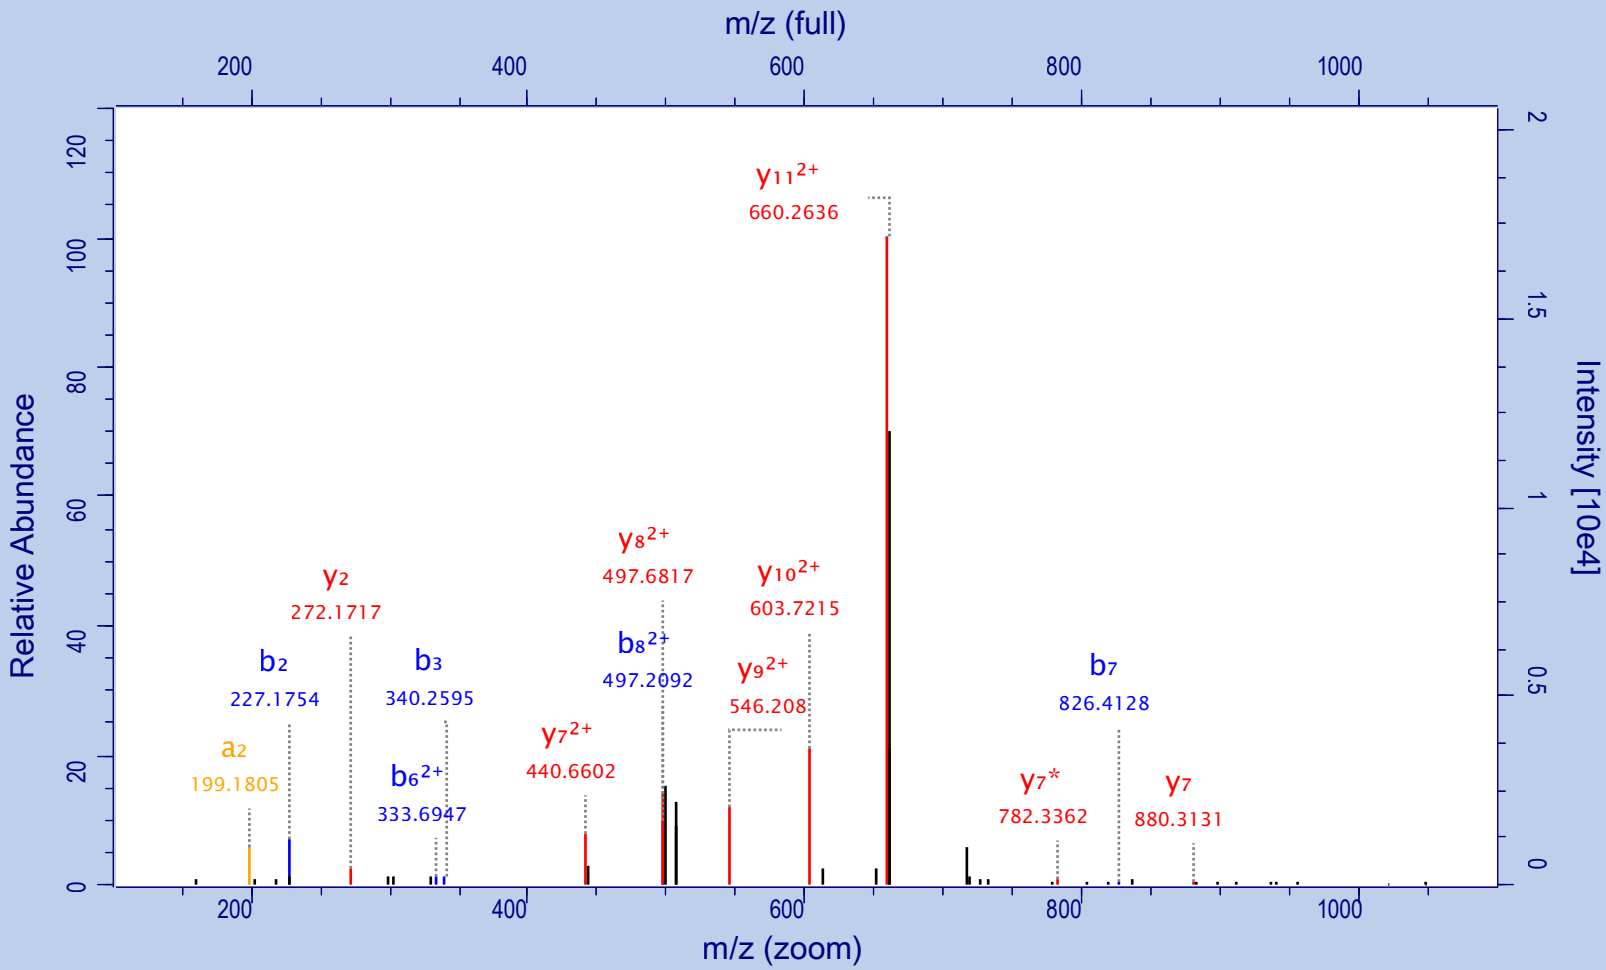

# pS95

Protein: Q8WYQ5-1; Q8WYQ5; Q53GY5; Q8WYQ5-3; Q8WYQ5; Q8WYQ5-2; Q8WYQ5; C9JSD5  
 Score: 72.23  
 Source: OT10-0371\_TiO2EI  
 Scannumber: 2963  
 Method: ITMS; CID; 2

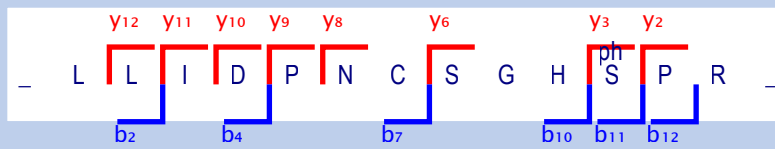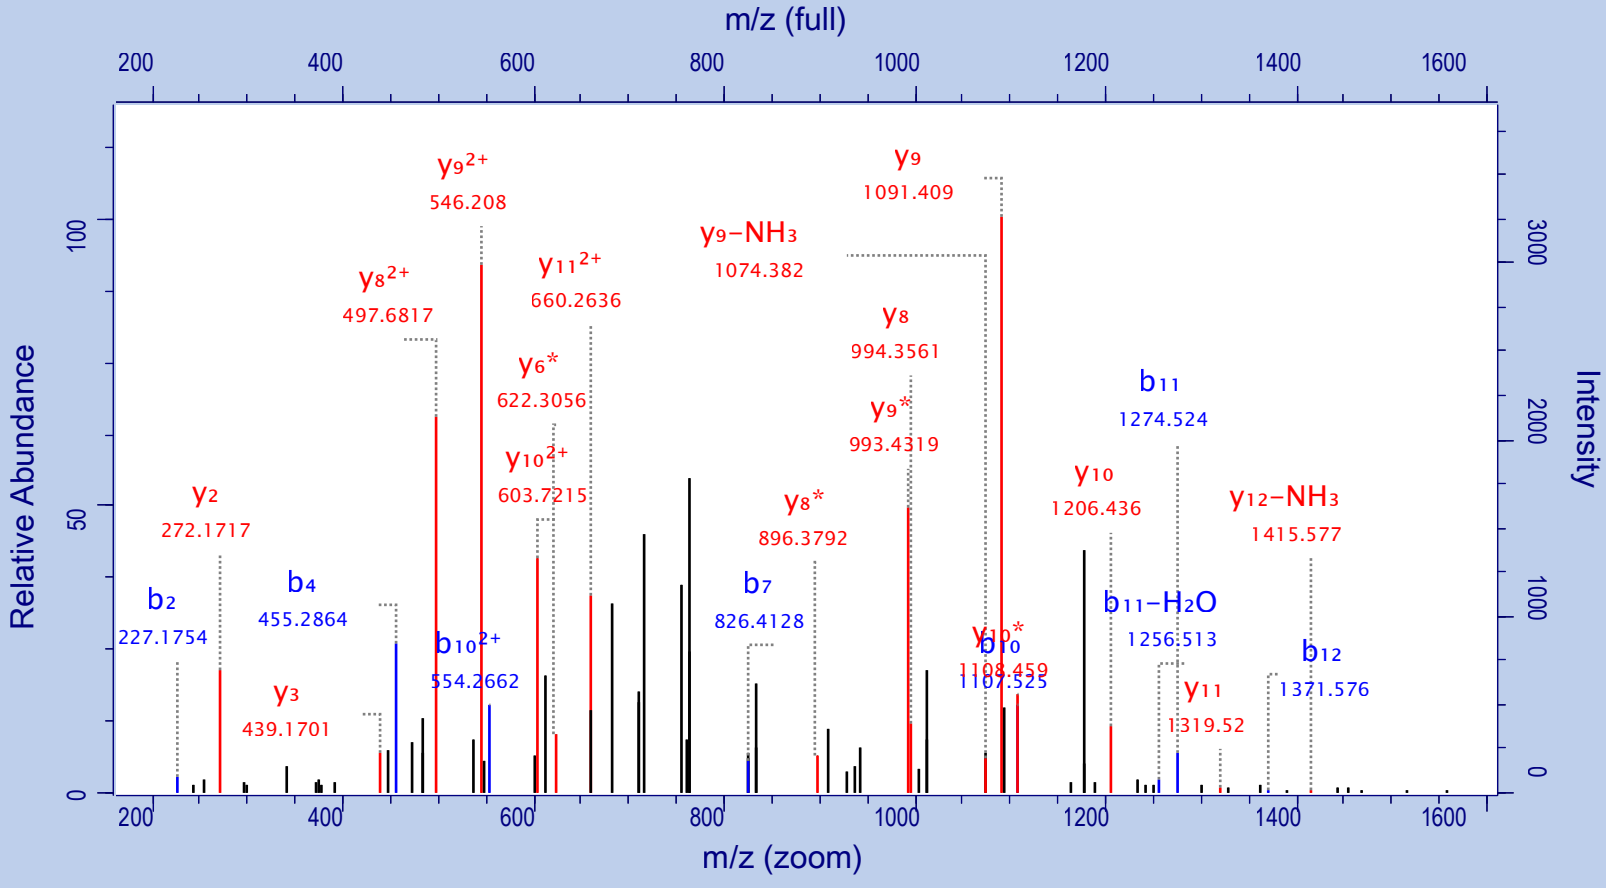

# pSer109

Protein: Q8WYQ5-1; Q8WYQ5; Q53GY5; Q8WYQ5-3; Q8WYQ5; Q8WYQ5-2; Q8WYQ5; C9JSD5  
Score: 17.87  
Source: OT11-1424  
Scannumber: 2811  
Method: ITMS; CID; 2

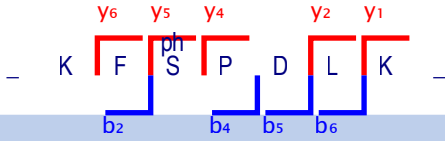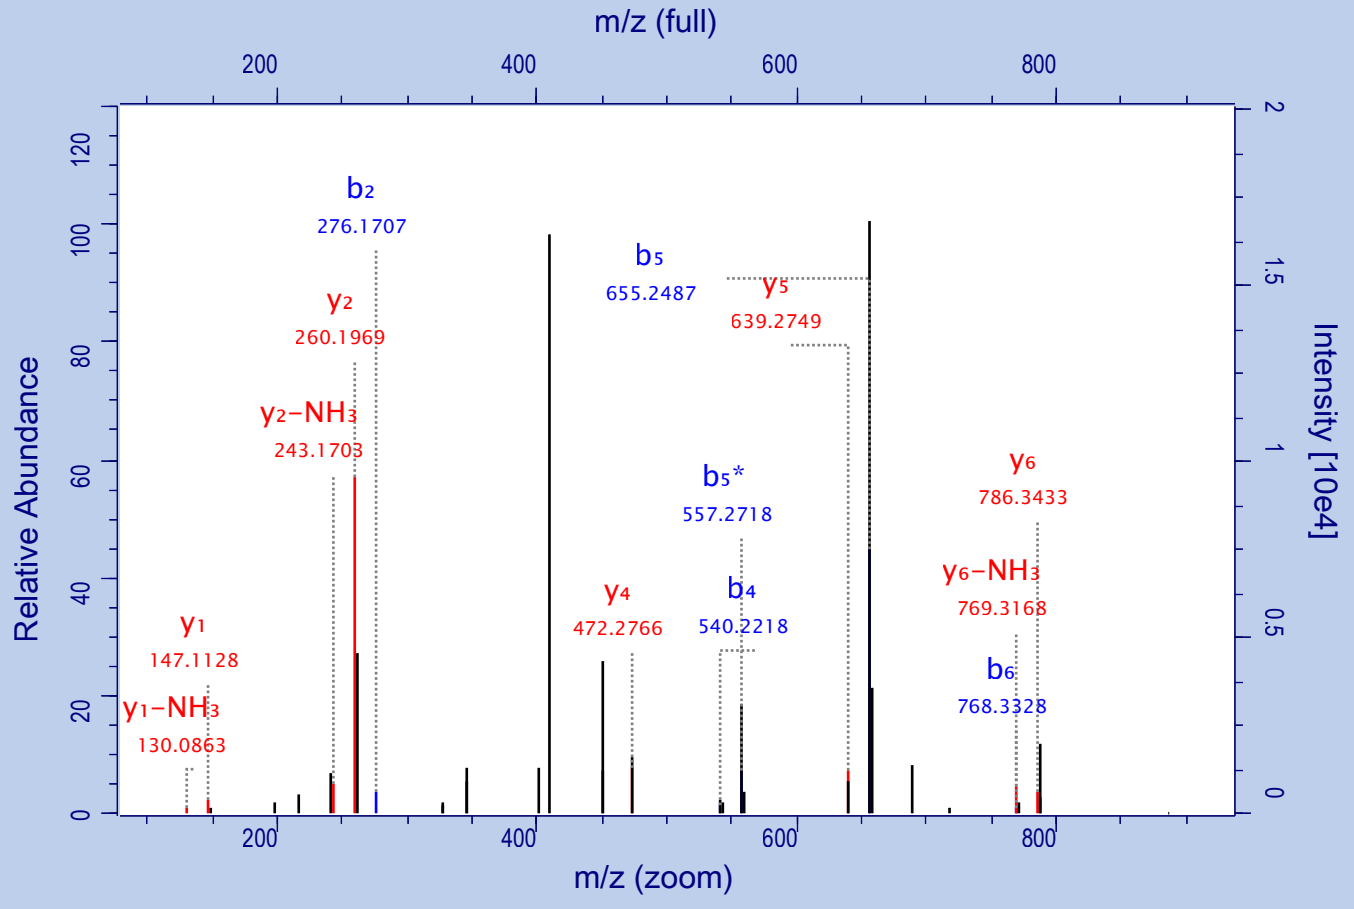

# pSer123

Protein: Q8WYQ5-1; Q8WYQ5; Q53CY5; Q8WYQ5-3; Q8WYQ5; Q8WYQ5-2; Q8WYQ5  
Score: 37.01  
Source: VOT11-1093  
Scannumber: 2109  
Method: FTMS; HCD; 2

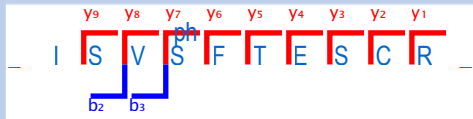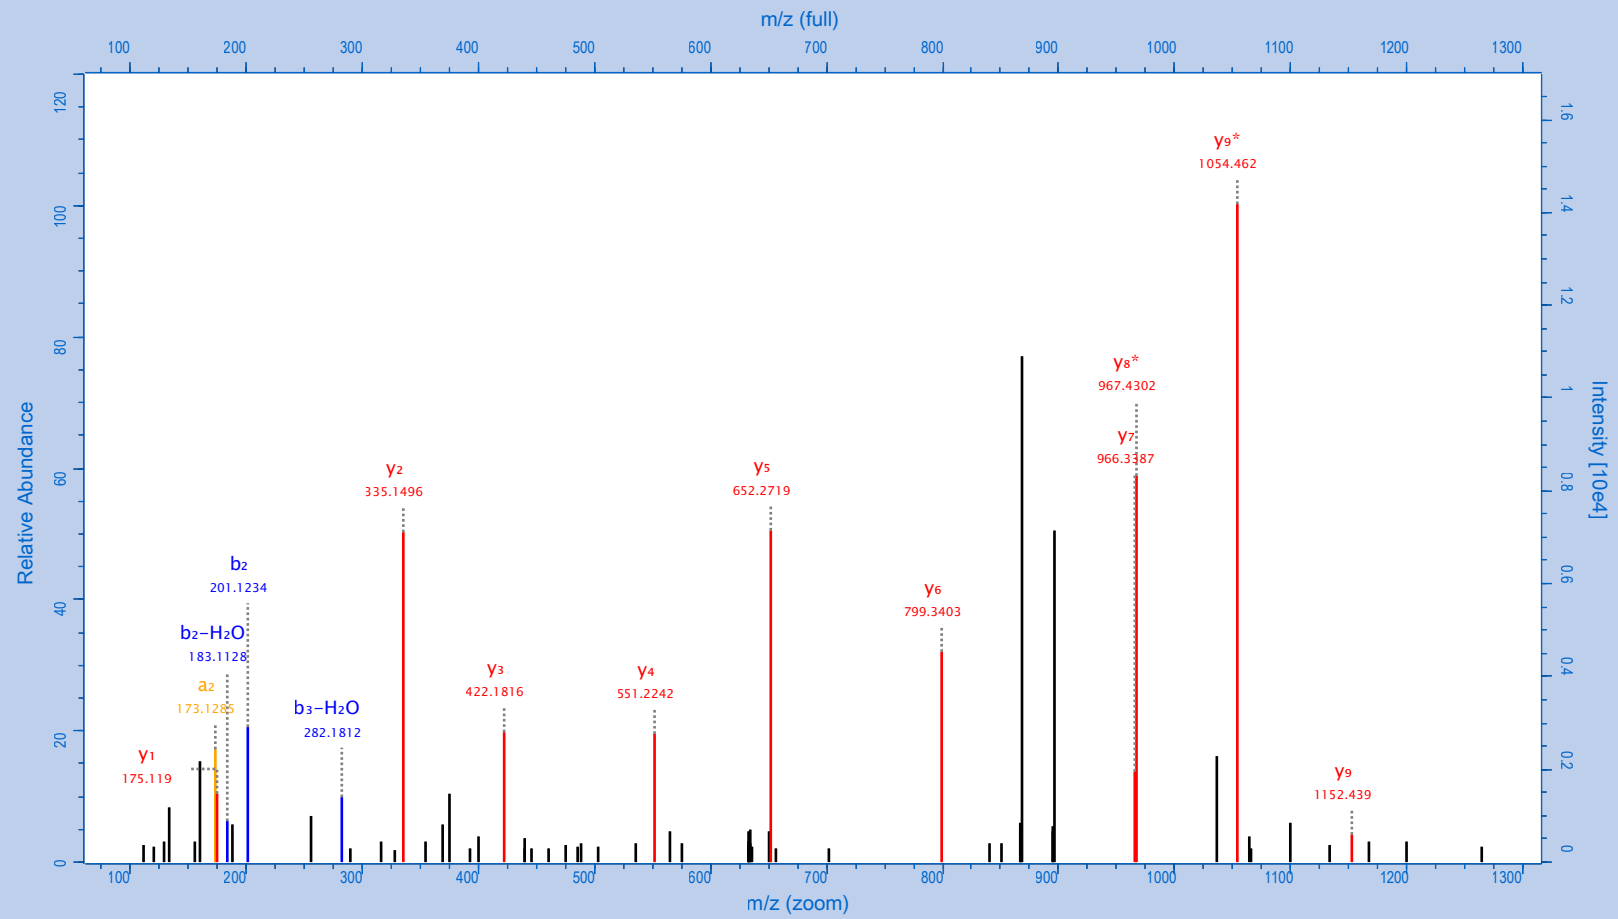



# pSer123 and pSer127

Protein: Q8WYQ5-1; Q8WYQ5; Q53GY5; Q8WYQ5-3; Q8WYQ5; Q8WYQ5-2; Q8WYQ5  
Score: 39.39  
Source: VOT11-1093  
Scannumber: 2107  
Method: FTMS; HCD; 2

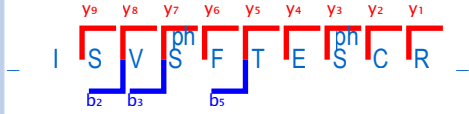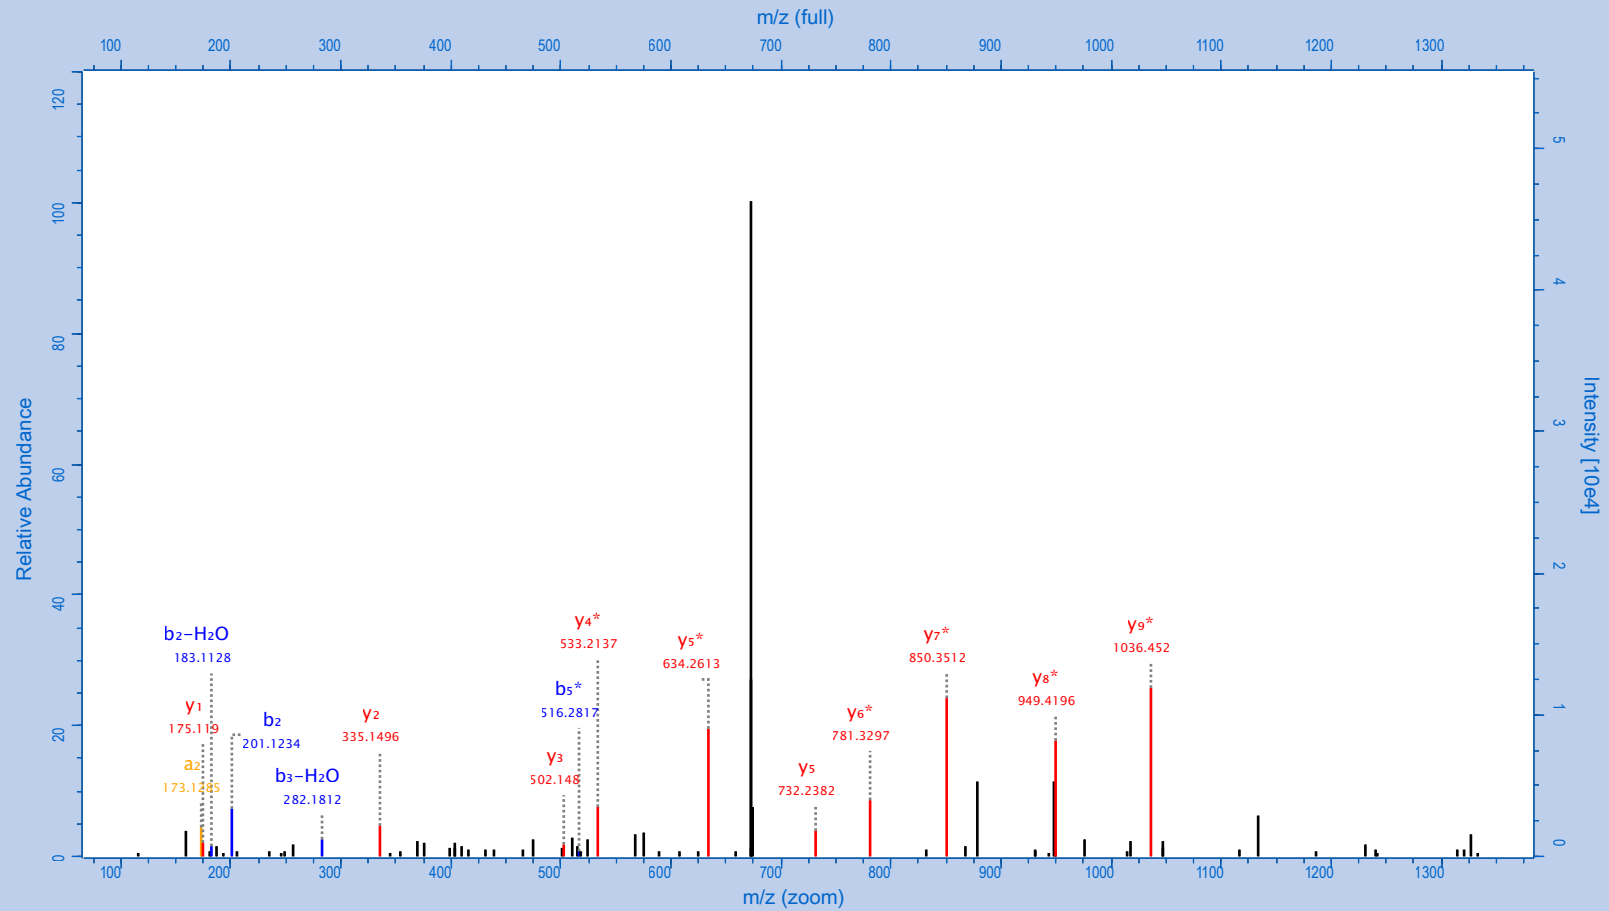

# pThr125

Protein: Q8WYQ5-1; Q8WYQ5; Q53GY5; Q8WYQ5-3; Q8WYQ5; Q8WYQ5-2; Q8WYQ5  
Score: 72.11  
Source: VOT11-1093  
Scannumber: 2193  
Method: FTMS; HCD; 2

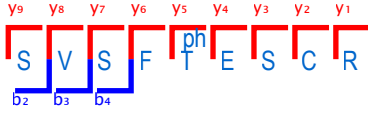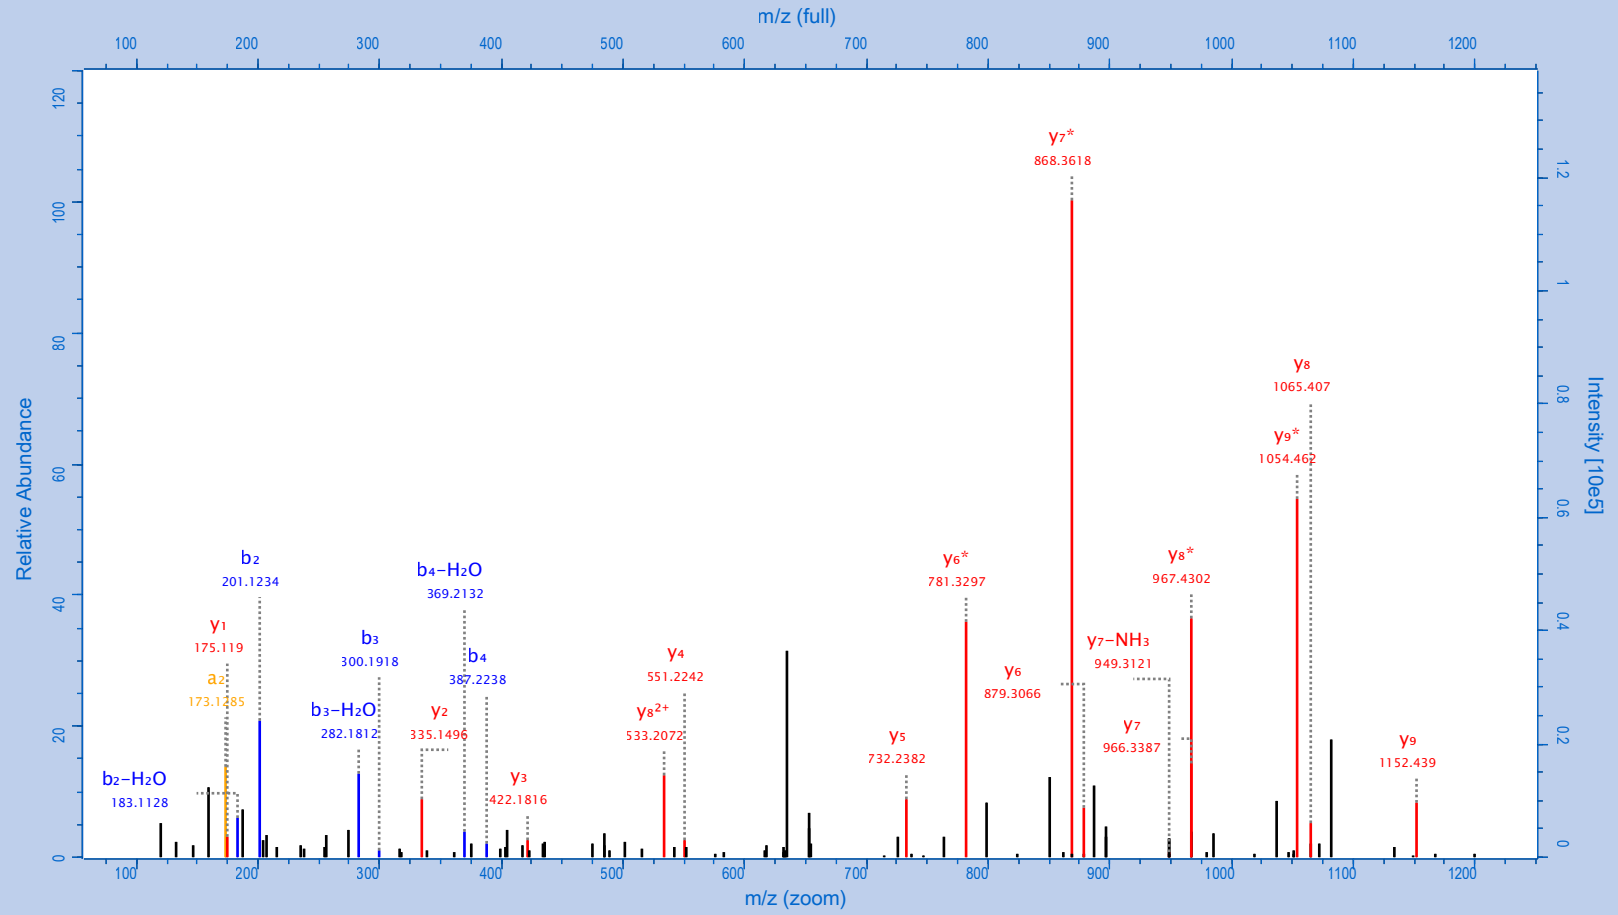

# pThr138

Protein: Q8WYQ5-1; Q8WYQ5; Q53GY5; Q8WYQ5-3; Q8WYQ5; Q8WYQ5-2; Q8WYQ5  
Score: 28.87  
Source: OT11-1424  
Scannumber: 2220  
Method: ITMS; CID; 2

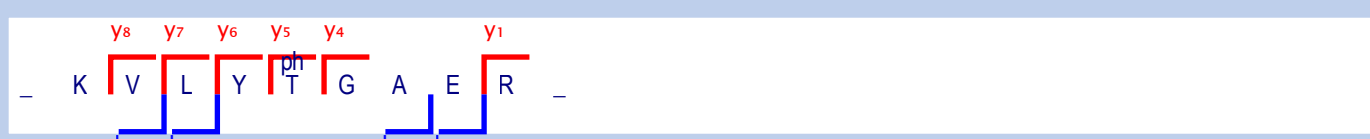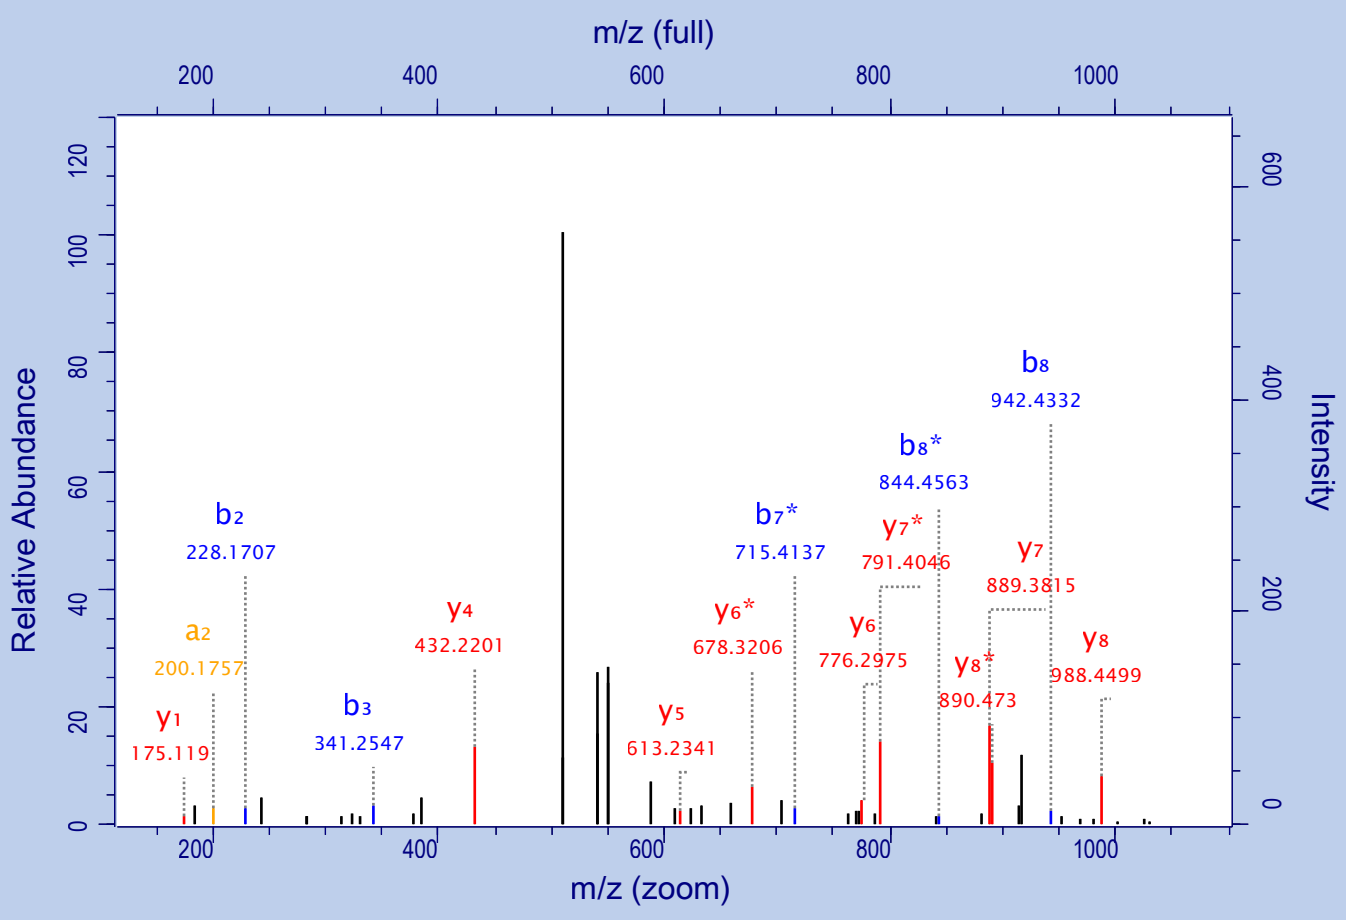

# pS153

Protein: Q8WYQ5-1; Q8WYQ5; Q53GY5; Q8WYQ5-3; Q8WYQ5; Q8WYQ5-2; Q8WYQ5  
Score: 88.03  
Source: OT10-0371\_TiO2EI  
Scannumber: 3794  
Method: ITMS; CID; 2

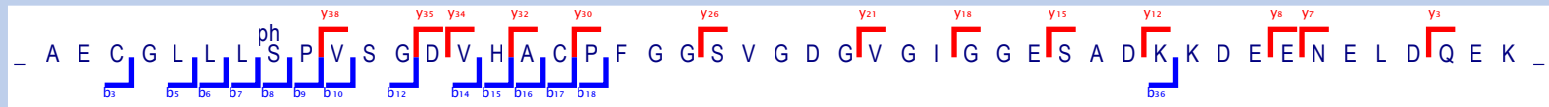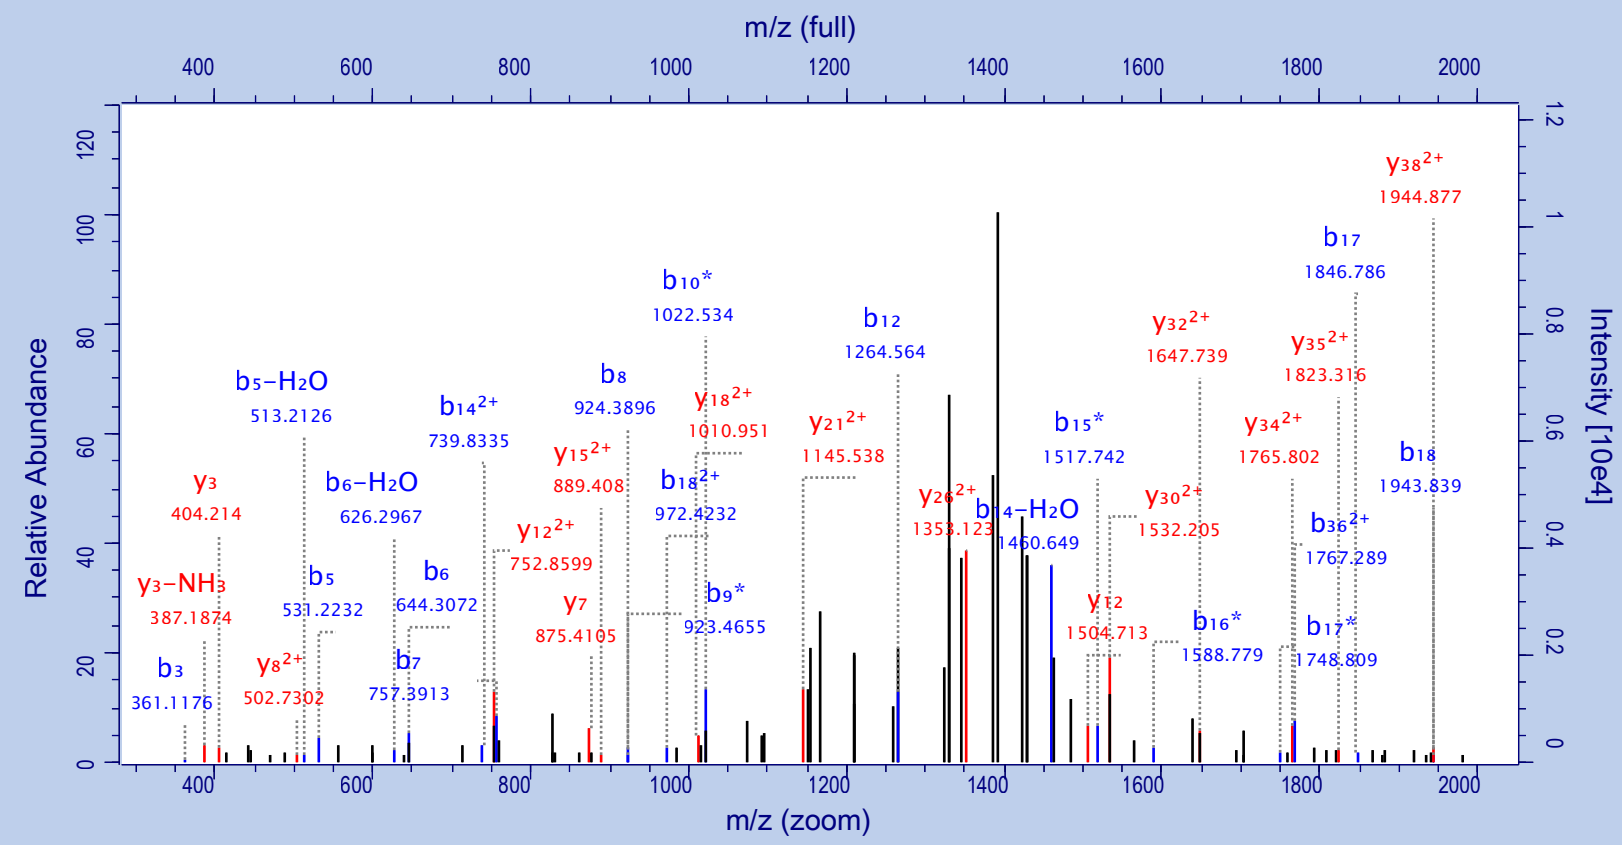

# pS156

Protein: Q8WYQ5-1; Q8WYQ5; Q53GY5; Q8WYQ5-3; Q8WYQ5; Q8WYQ5-2; Q8WYQ5  
 Score: 112.06  
 Source: OT10-0371\_TiO2EI  
 Scannumber: 4005  
 Method: ITMS; CID; 2

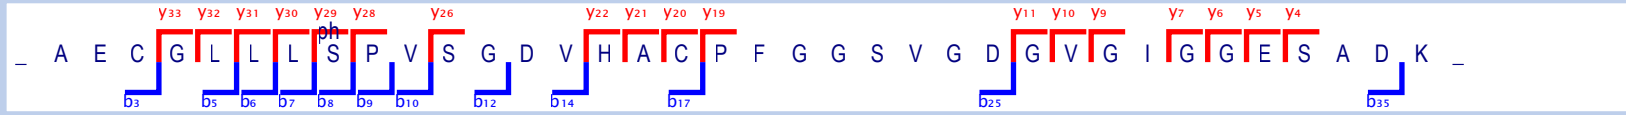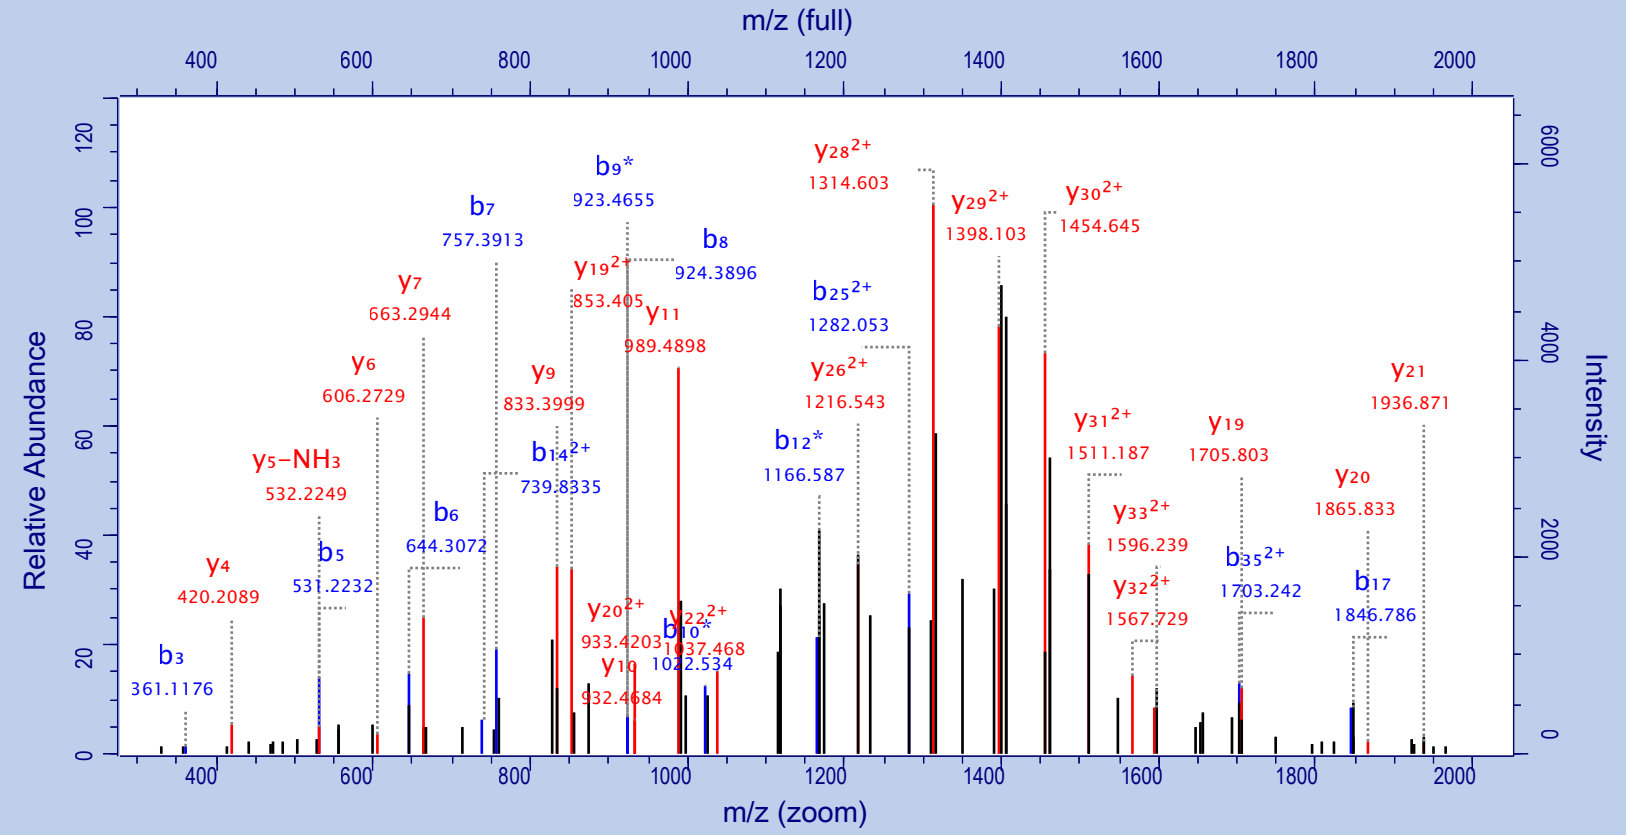

# pTyr267 and pSer271

Protein: Q8WYQ5-1; Q8WYQ5; Q53GY5; Q8WYQ5-3; Q8WYQ5; Q8WYQ5-2; Q8WYQ5  
 Score: 11.05  
 Source: OT11-1426  
 Scannumber: 2200  
 Method: ITMS; CID; 2

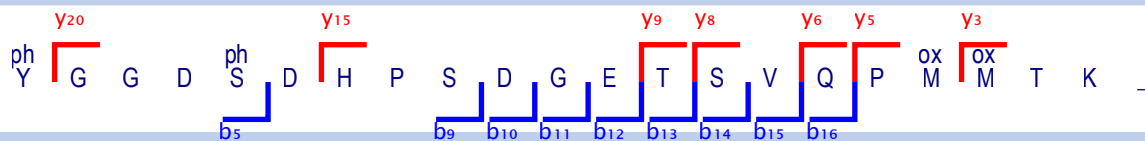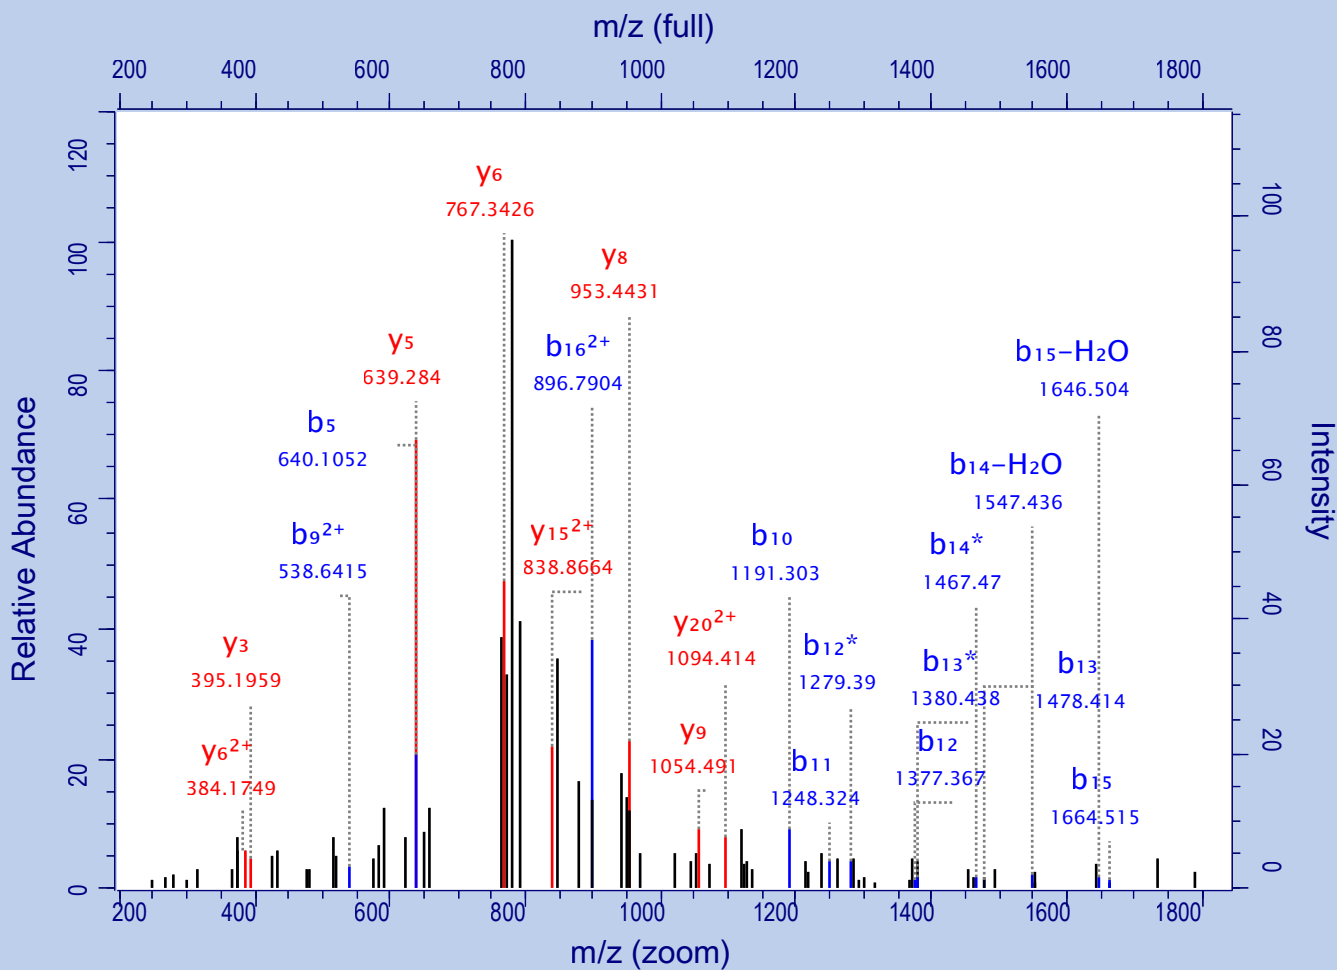

# pSer271

Protein: Q8WYQ5-1; Q8WYQ5; Q53GY5; Q8WYQ5-3; Q8WYQ5; Q8WYQ5-2; Q8WYQ5  
Score: 13.59  
Source: OT11-1419  
Scannumber: 2091  
Method: ITMS; CID; 2

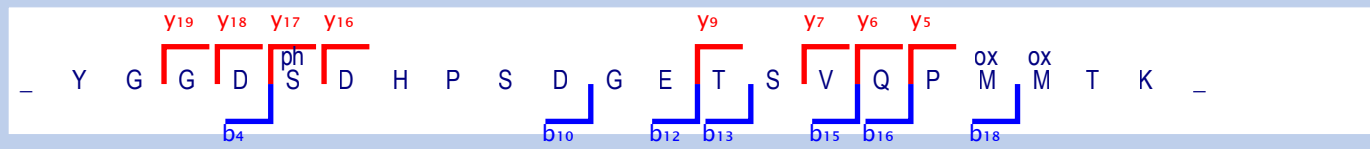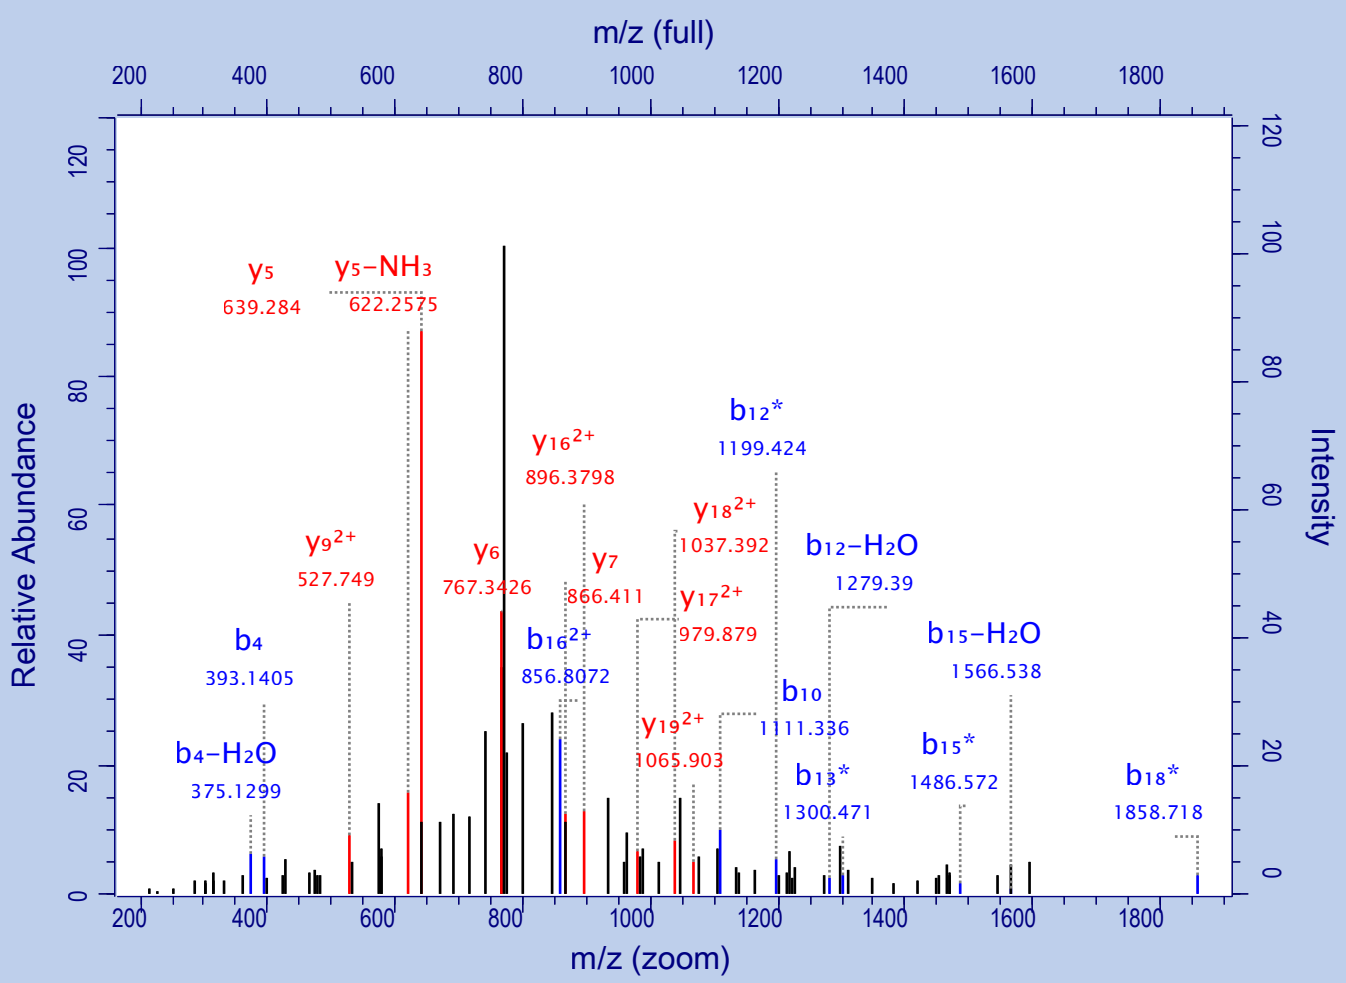

# pSer271 and pSer275

Protein: Q8WYQ5-1; Q8WYQ5; Q53GY5; Q8WYQ5-3; Q8WYQ5; Q8WYQ5-2; Q8WYQ5  
 Score: 94.93  
 Source: OT11-1424  
 Scannumber: 2125  
 Method: ITMS; CID; 2

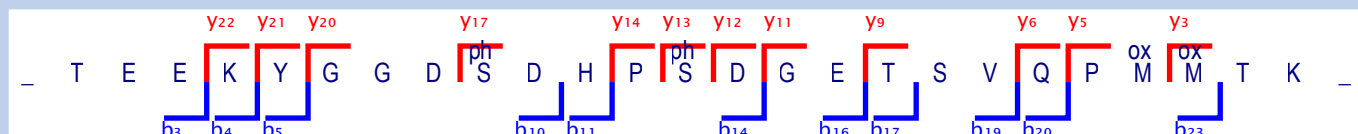

m/z (full)

400 600 800 1000 1200 1400 1600 1800 2000

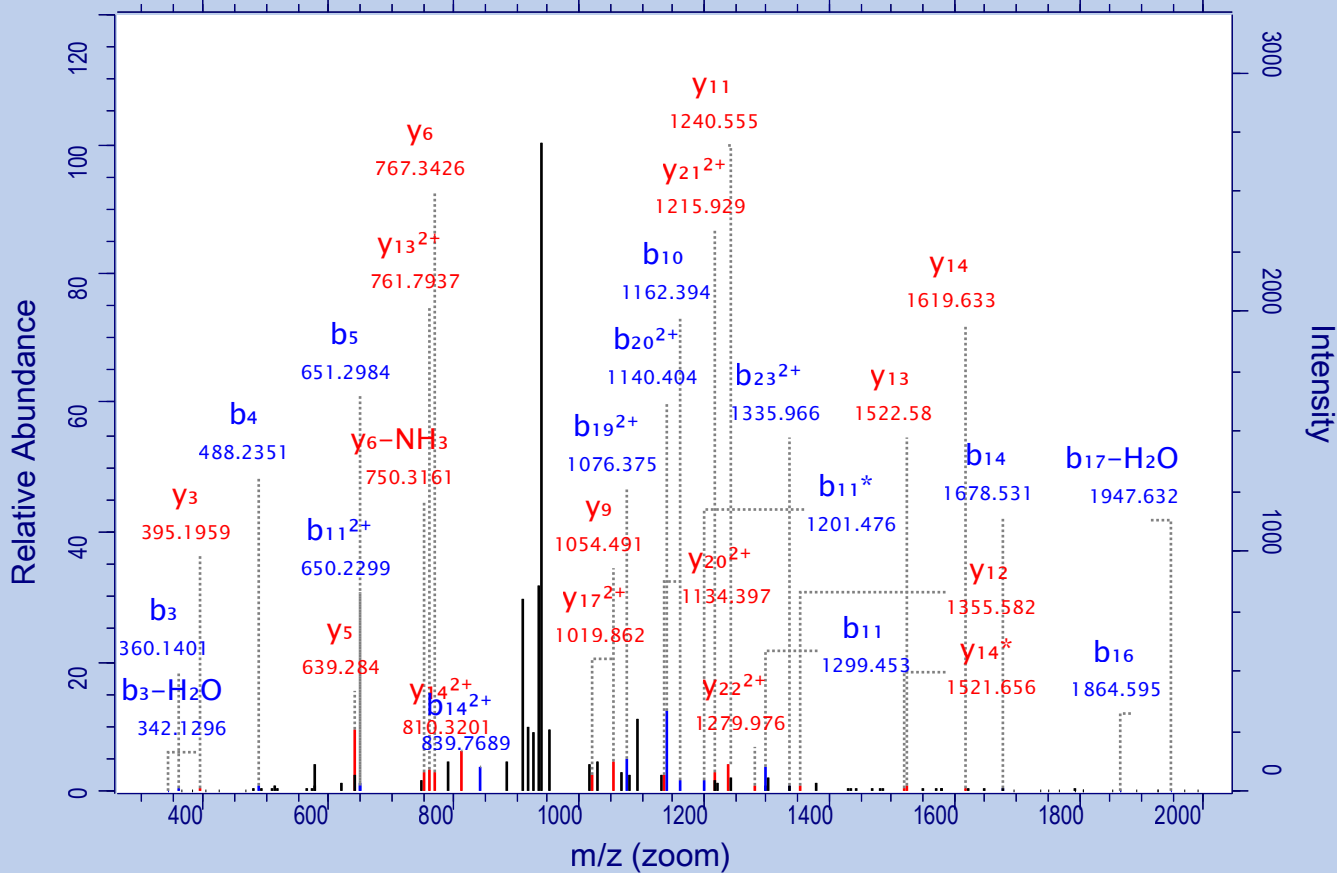



# pSer275

Protein: Q8WYQ5-1; Q8WYQ5; Q53GY5; Q8WYQ5-3; Q8WYQ5; Q8WYQ5-2; Q8WYQ5  
 Score: 79.11  
 Source: OT11-1419  
 Scannumber: 2082  
 Method: ITMS; CID; 2

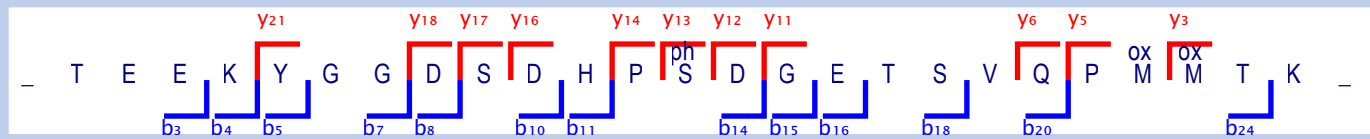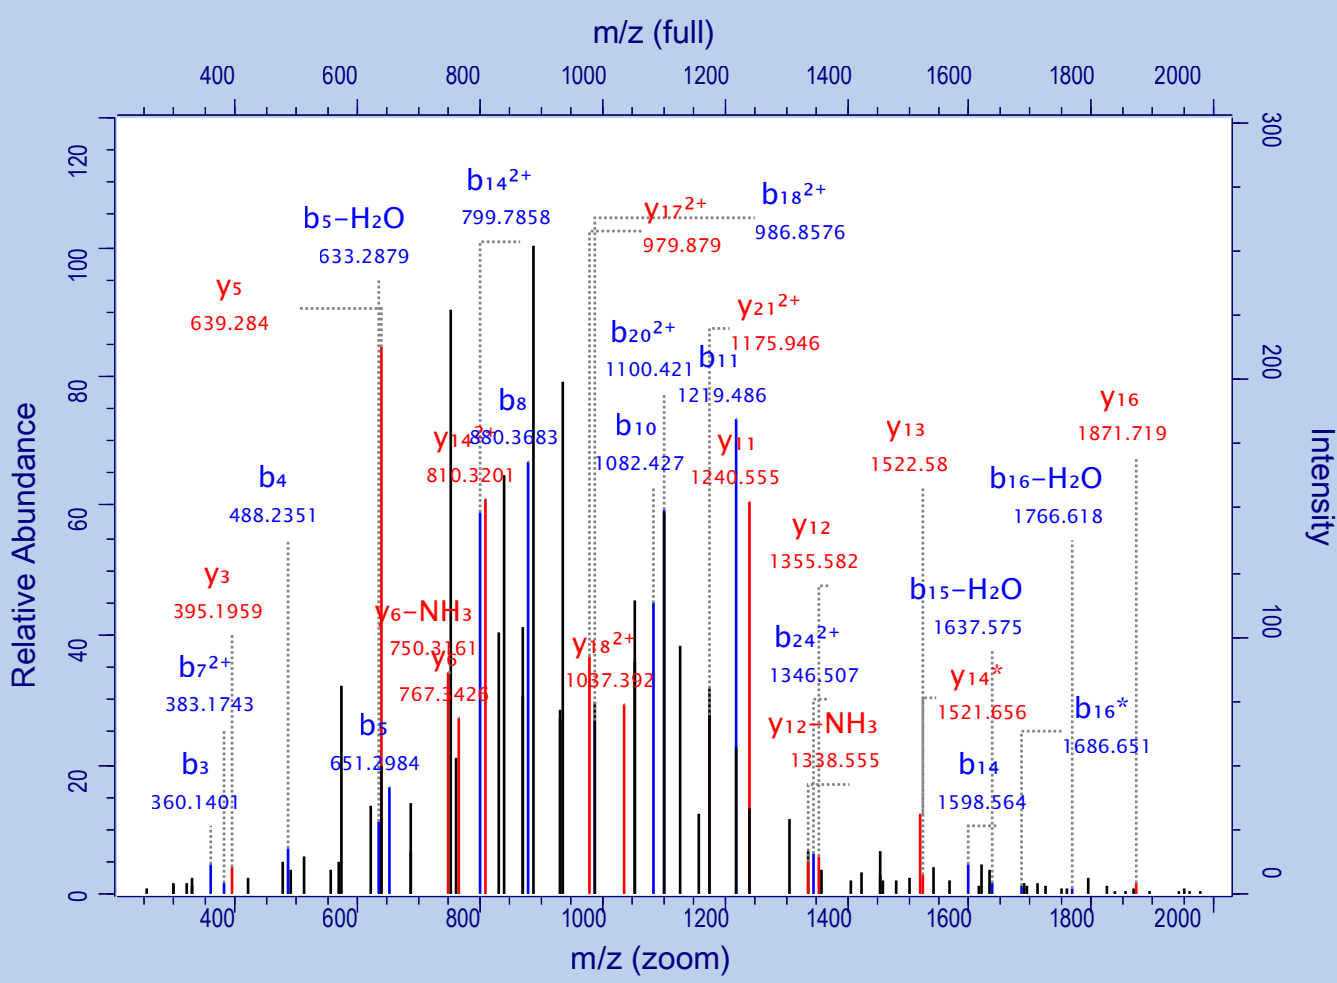

# pSer271 and pThr279

Protein: Q8WYQ5-1; Q8WYQ5; Q53GY5; Q8WYQ5-3; Q8WYQ5; Q8WYQ5-2; Q8WYQ5  
 Score: 96.68  
 Source: OT11-1417  
 Scannumber: 2740  
 Method: ITMS; CID; 2

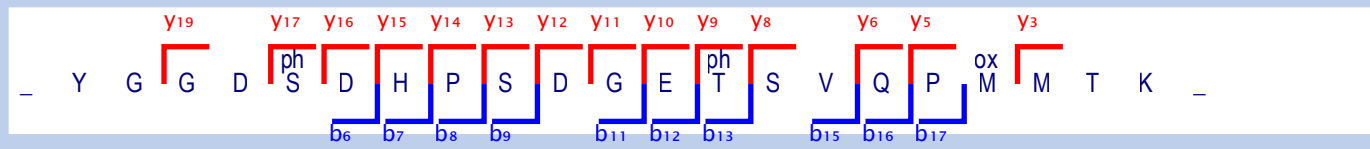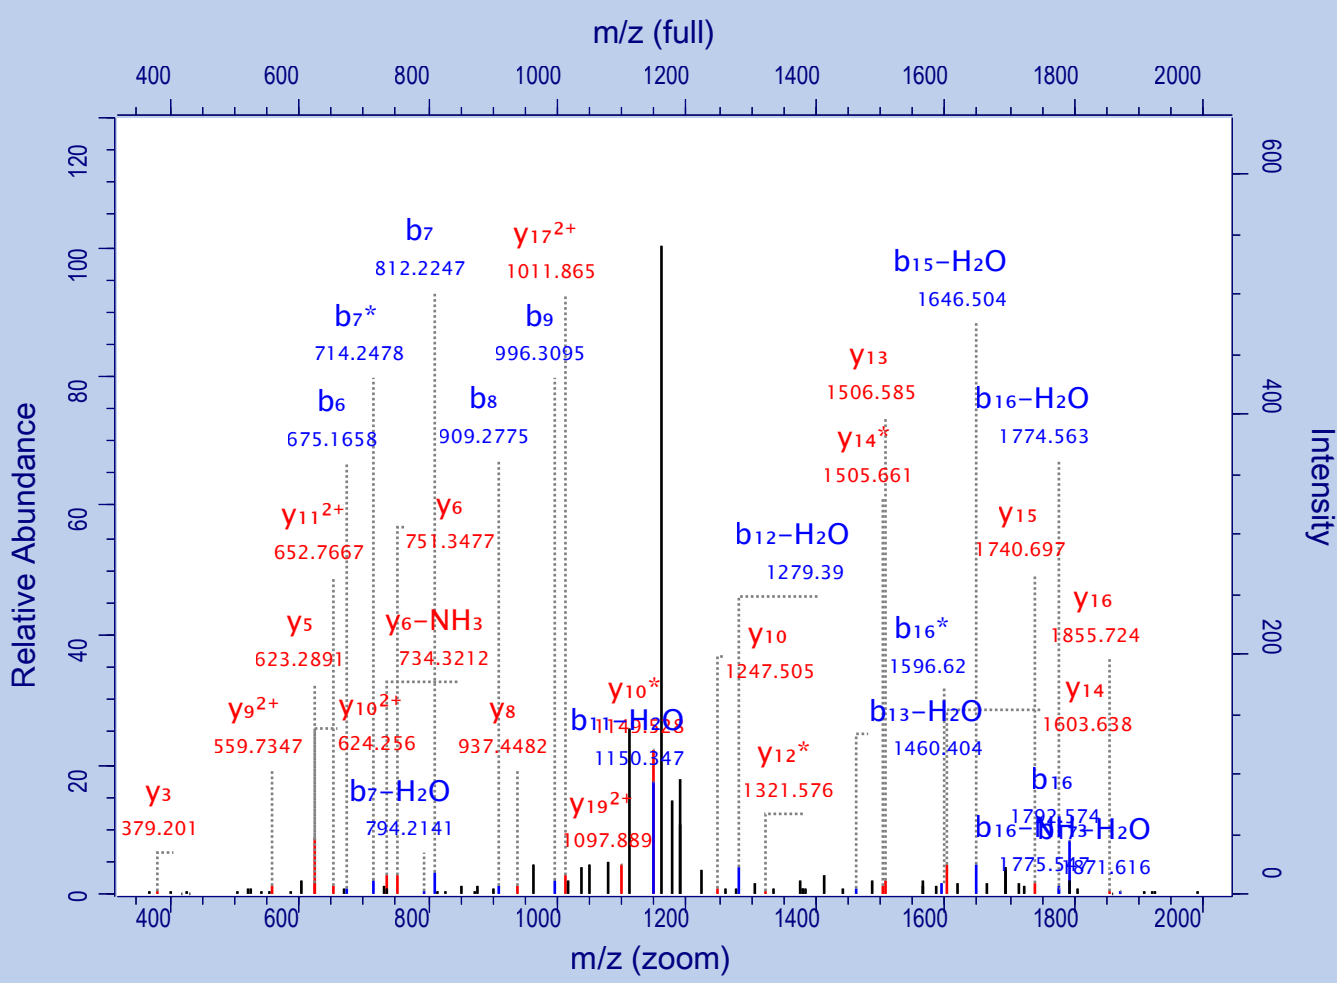

# pSer271 and pSer280

Protein: Q8WYQ5-1; Q8WYQ5; Q53GY5; Q8WYQ5-3; Q8WYQ5; Q8WYQ5-2; Q8WYQ5  
 Score: 39.68  
 Source: OT11-1419  
 Scannumber: 2031  
 Method: ITMS; CID; 2

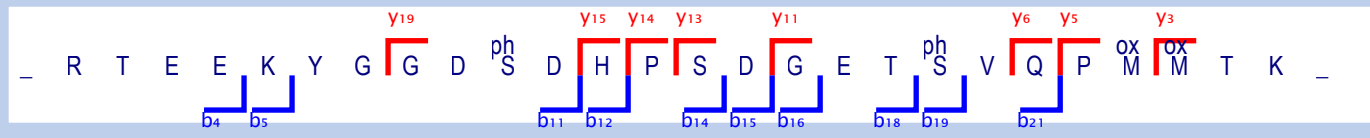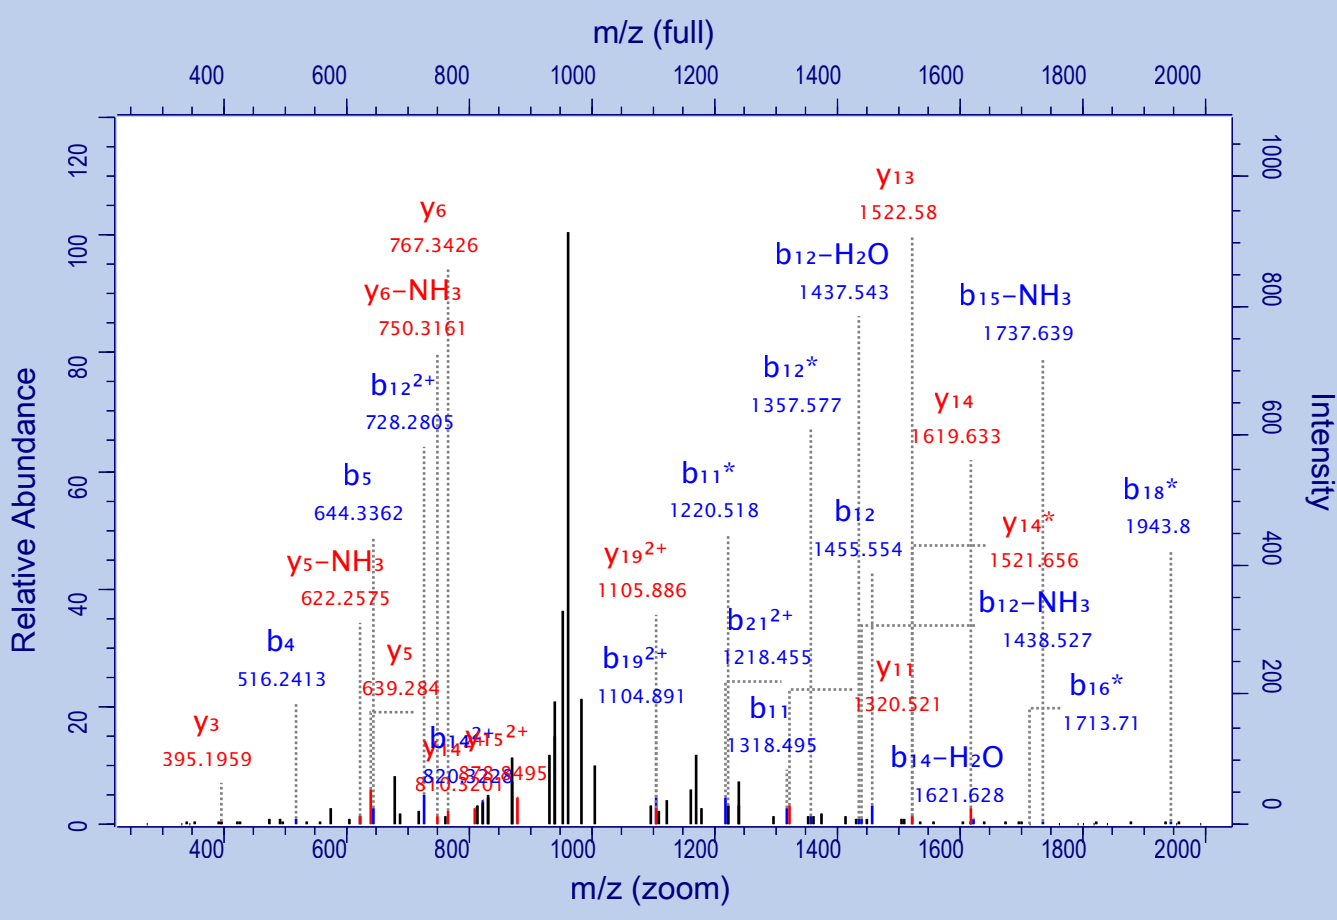

# pThr371 and pSer383

Protein: Q8WYQ5-1; Q8WYQ5; Q53GY5; Q8WYQ5-3; Q8WYQ5  
Score: 25.47  
Source: OT11-1417  
Scannumber: 3567  
Method: ITMS; CID; 2

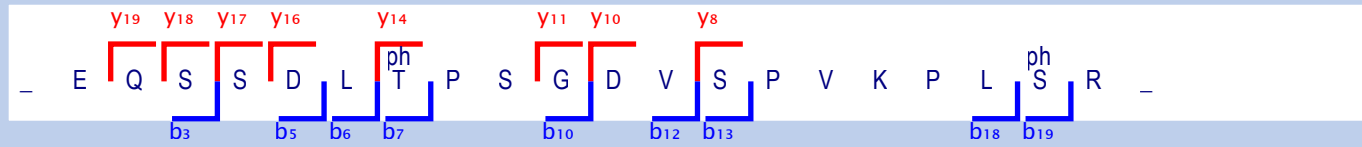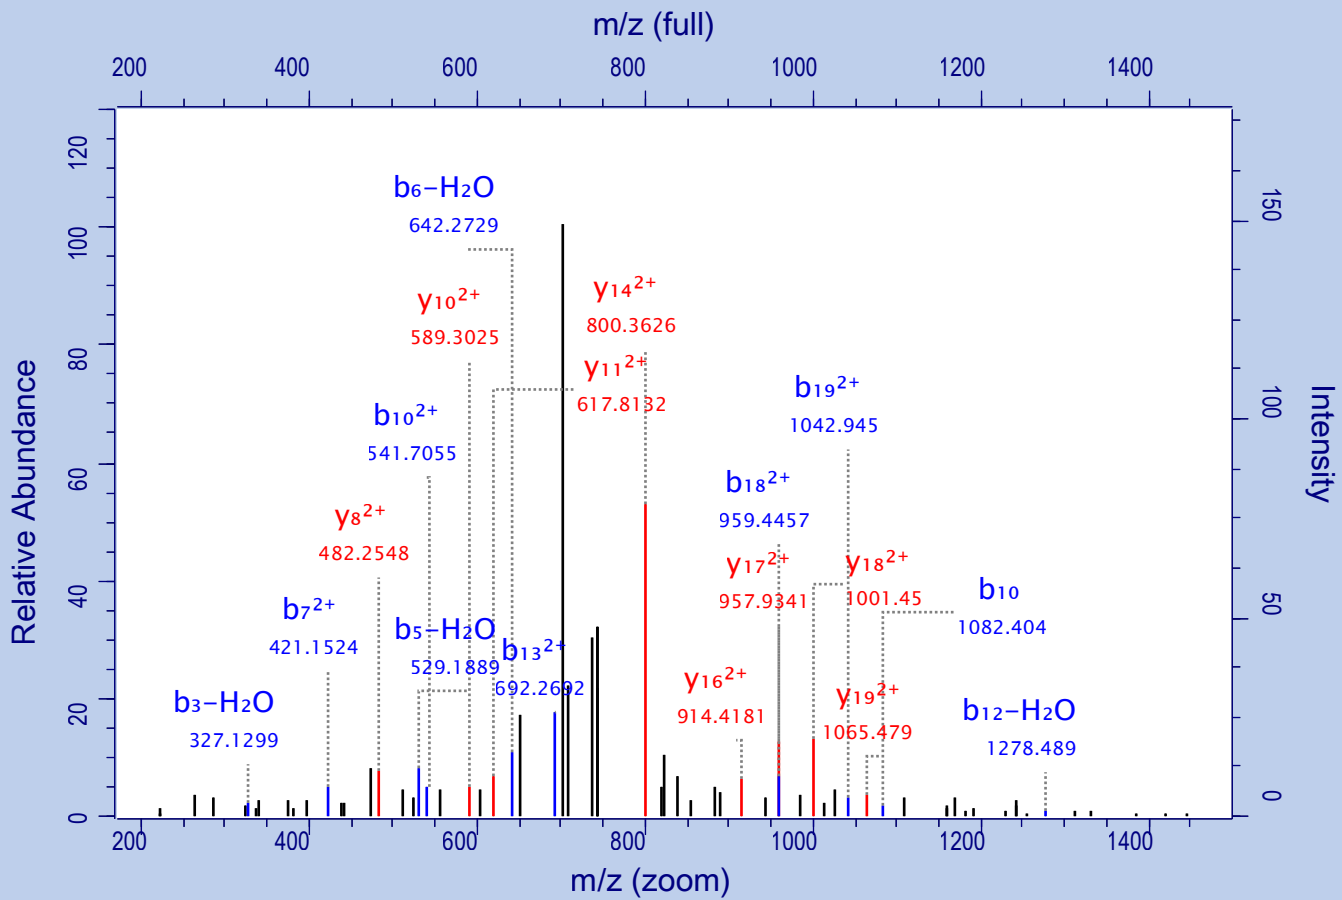

# pSer373

Protein: Q8WYQ5-1; Q8WYQ5; Q53GY5; Q8WYQ5-3; Q8WYQ5  
Score: 7.79  
Source: OT11-1417  
Scannumber: 3532  
Method: ITMS; CID; 2

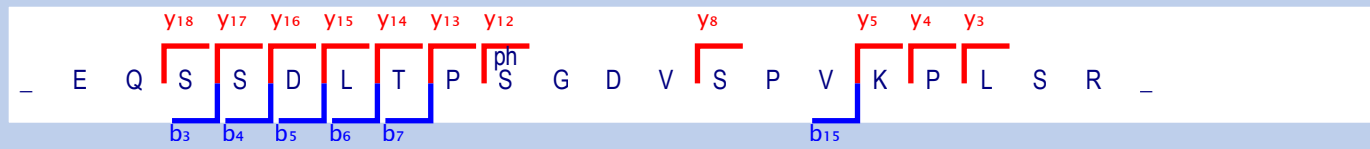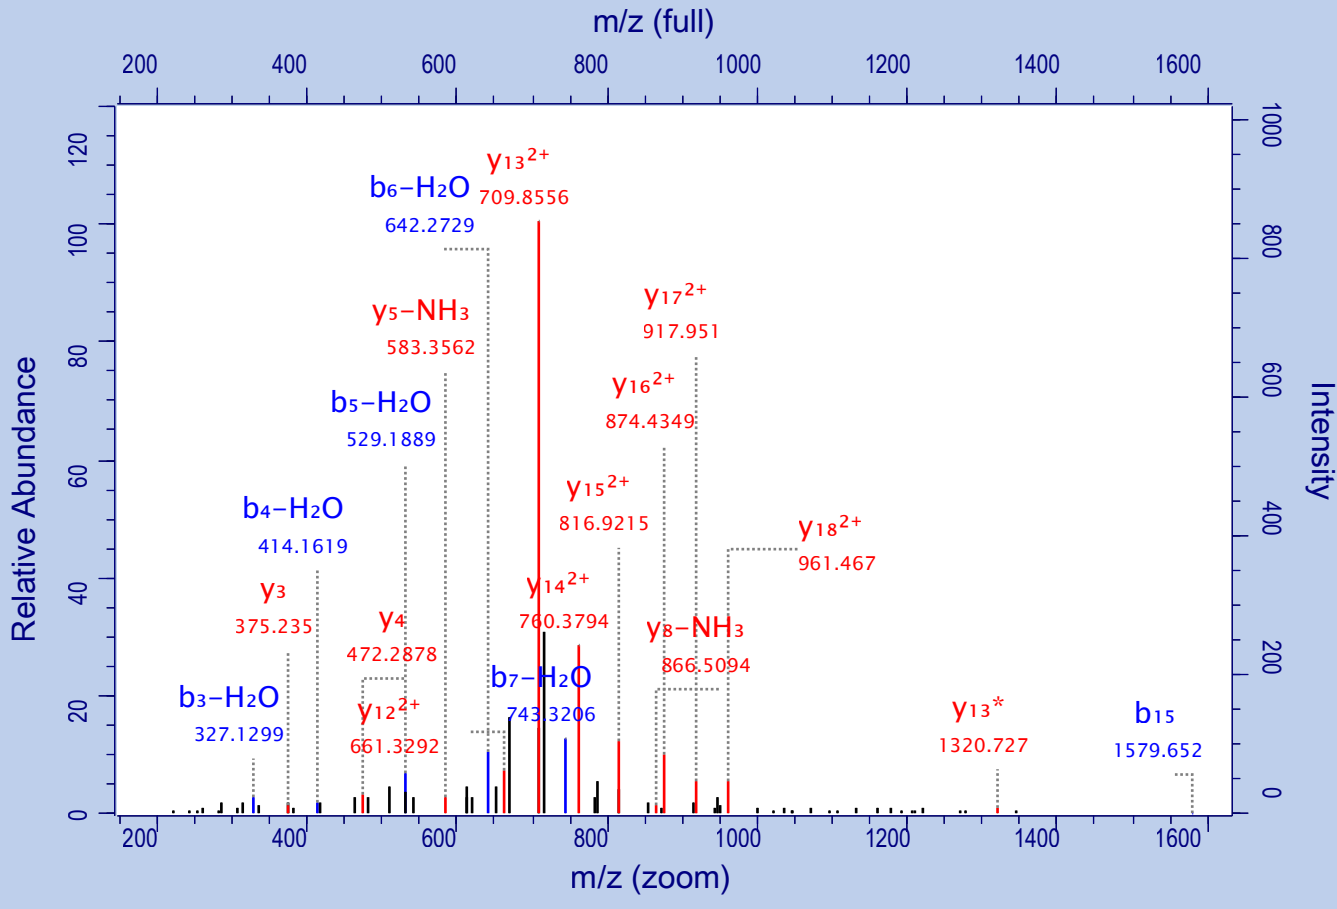



# pSer377

Protein: Q8WYQ5-1; Q8WYQ5; Q53GY5; Q8WYQ5-3; Q8WYQ5  
 Score: 87.72  
 Source: OT11-1423  
 Scannumber: 3620  
 Method: ITMS; CID; 2

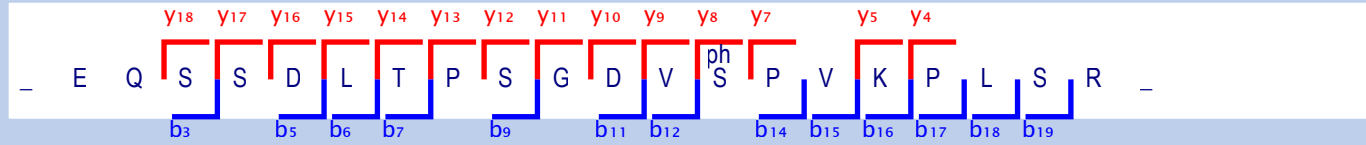

m/z (full)

400 600 800 1000 1200 1400 1600 1800 2000

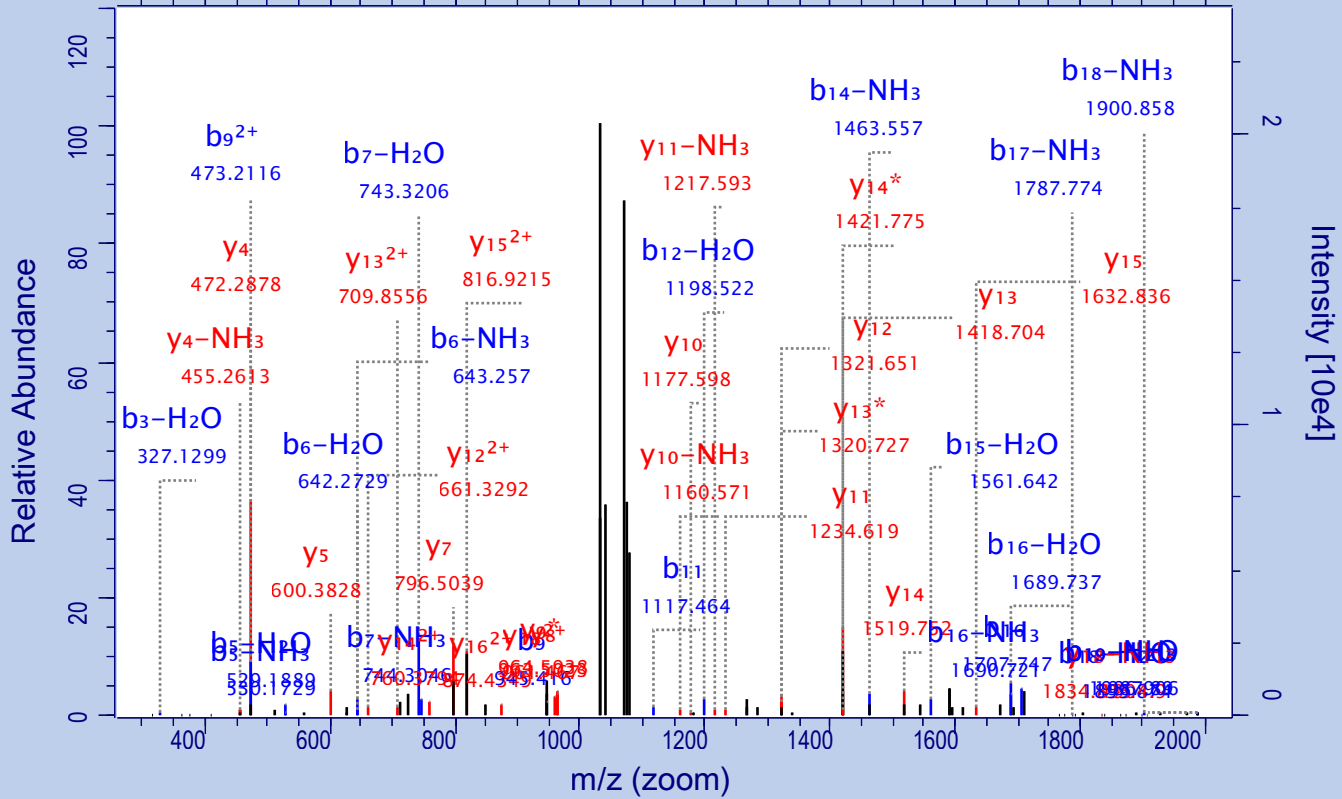

# pSer385

Protein: Q8WYQ5-1; Q8WYQ5; Q53GY5; Q8WYQ5-3; Q8WYQ5  
 Score: 74.8  
 Source: OT10-0371\_TiO2EI  
 Scannumber: 4105  
 Method: ITMS; CID; 2

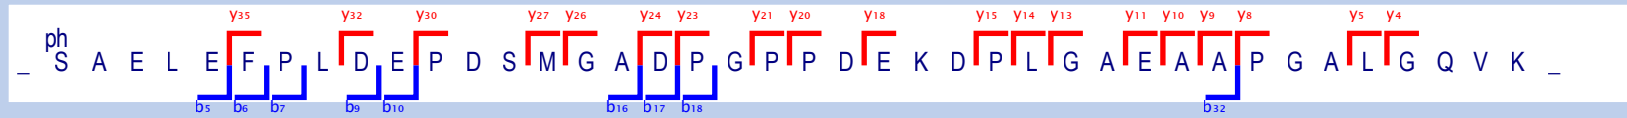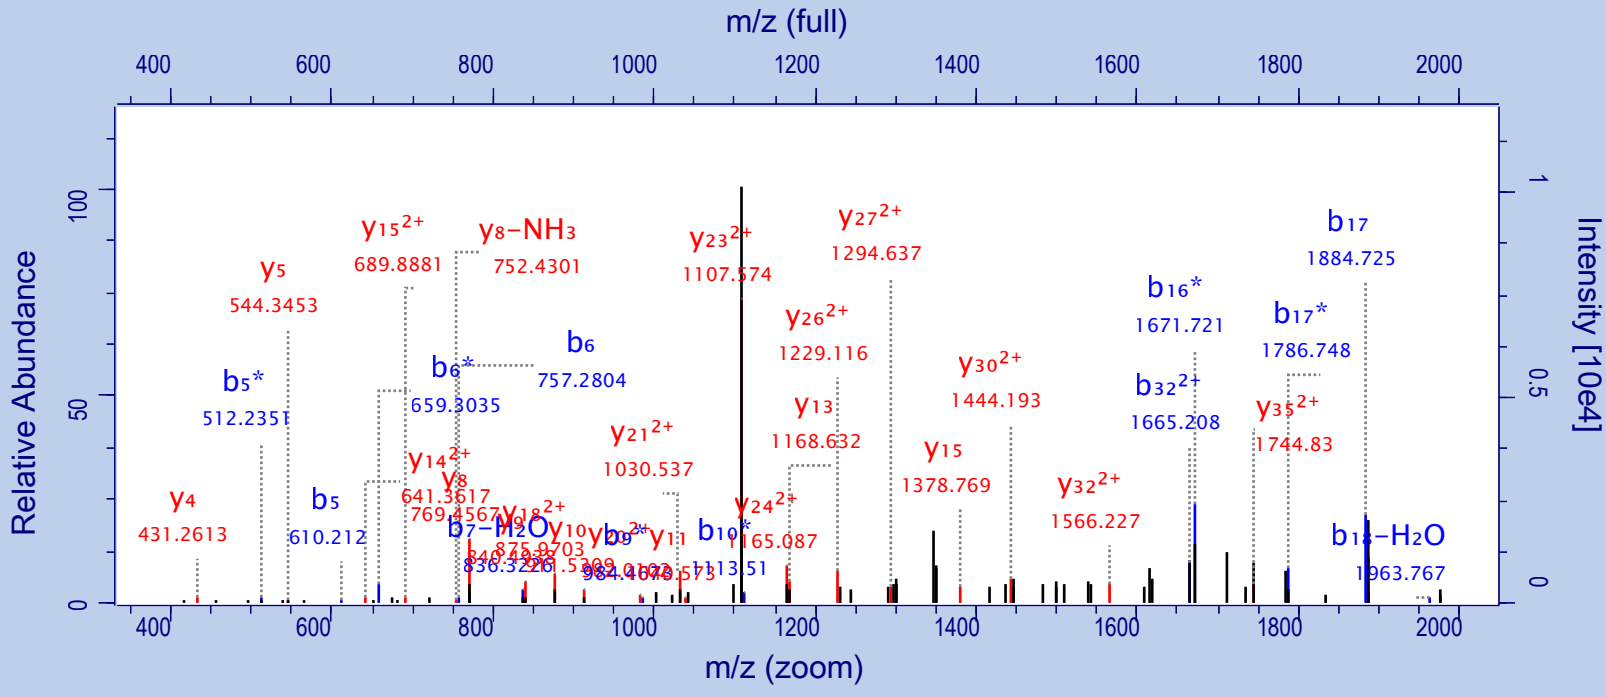



# pSer397

Protein: Q8WYQ5-1; Q8WYQ5; Q53GY5; Q8WYQ5-3; Q8WYQ5  
 Score: 63.31  
 Source: OT11-1423  
 Scannumber: 6325  
 Method: ITMS; CID; 2

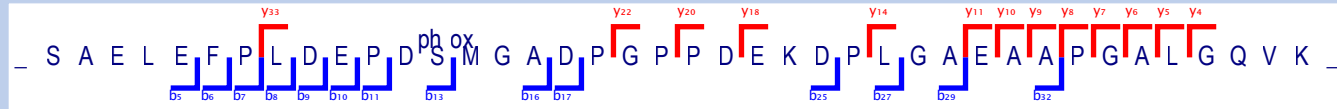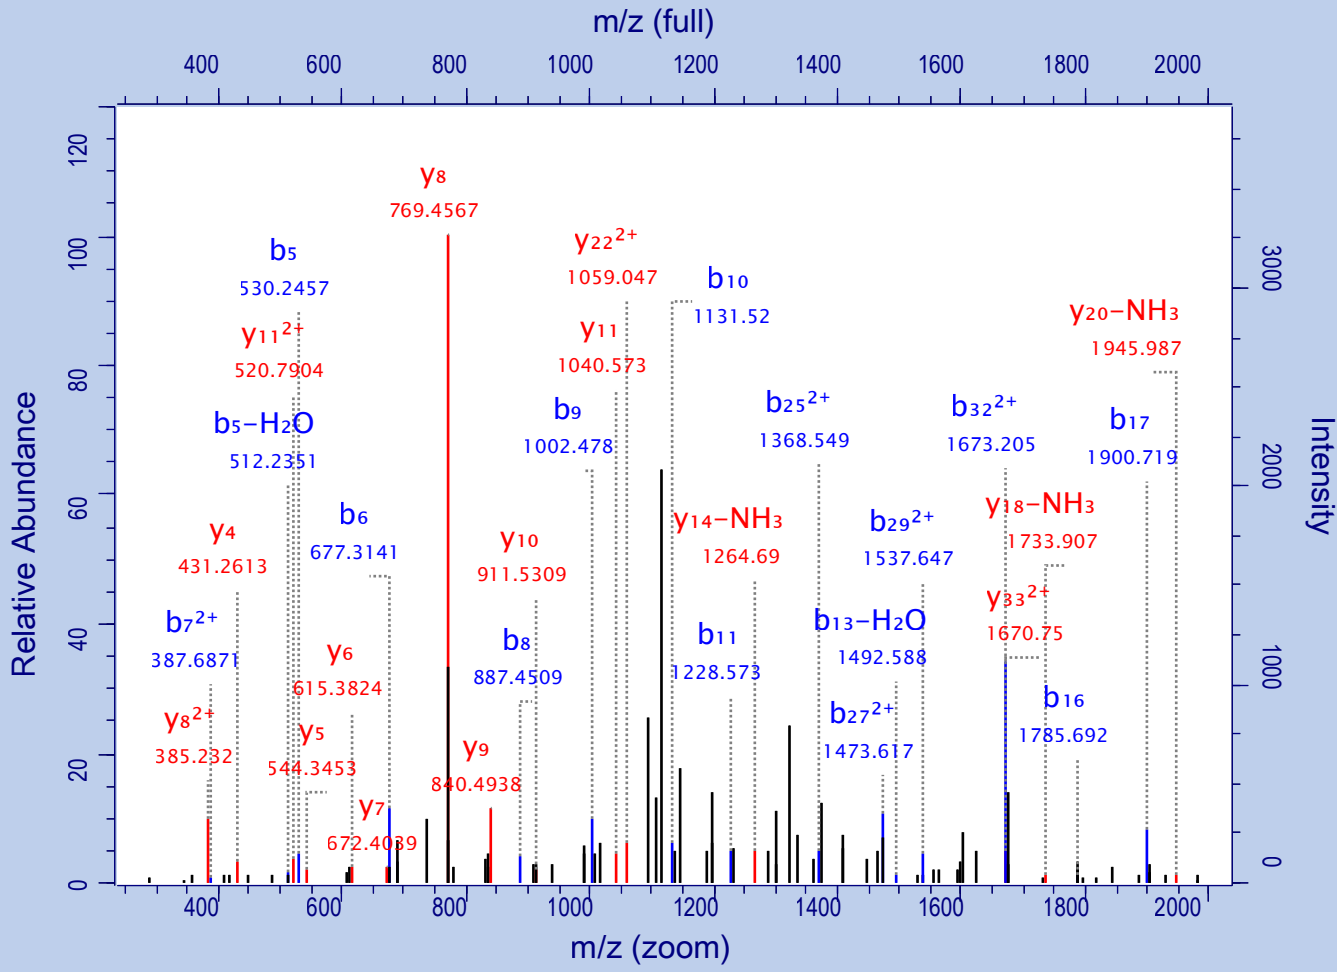

# pSer434

Protein: Q8WYQ5-1; Q8WYQ5; Q53GY5; Q8WYQ5-3; Q8WYQ5  
Score: 22.03  
Source: OT10-0371\_TiO2EI  
Scannumber: 3401  
Method: ITMS; CID; 2

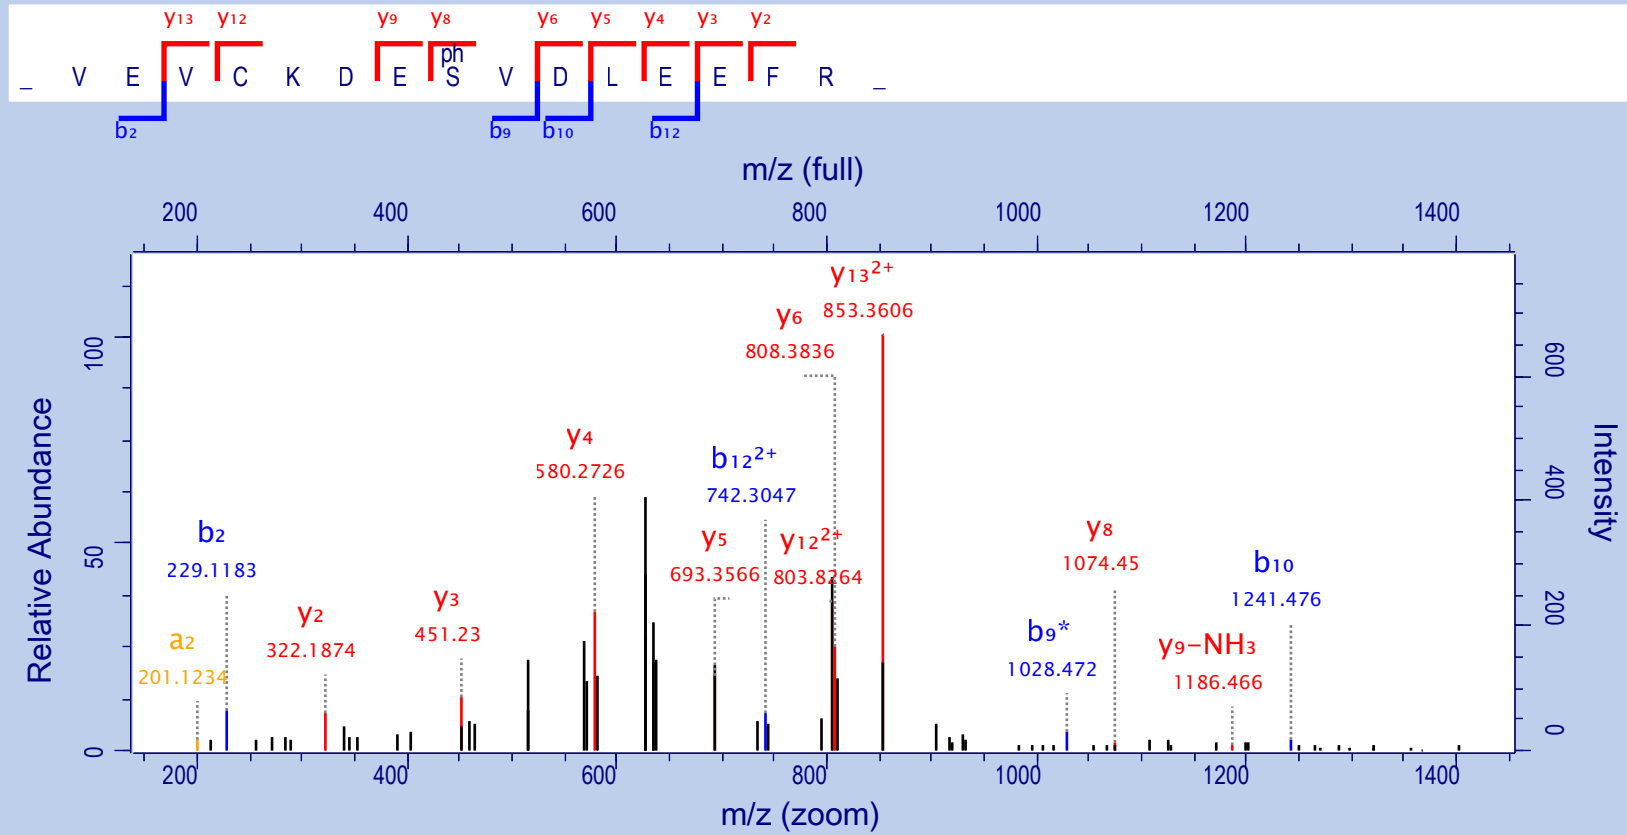

# pSer454

Protein: Q8WYQ5-1; Q8WYQ5; Q53GY5; Q8WYQ5-3; Q8WYQ5  
Score: 9.2  
Source: OT11-1424  
Scannumber: 3659  
Method: ITMS; CID; 2

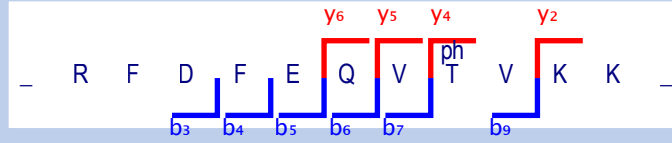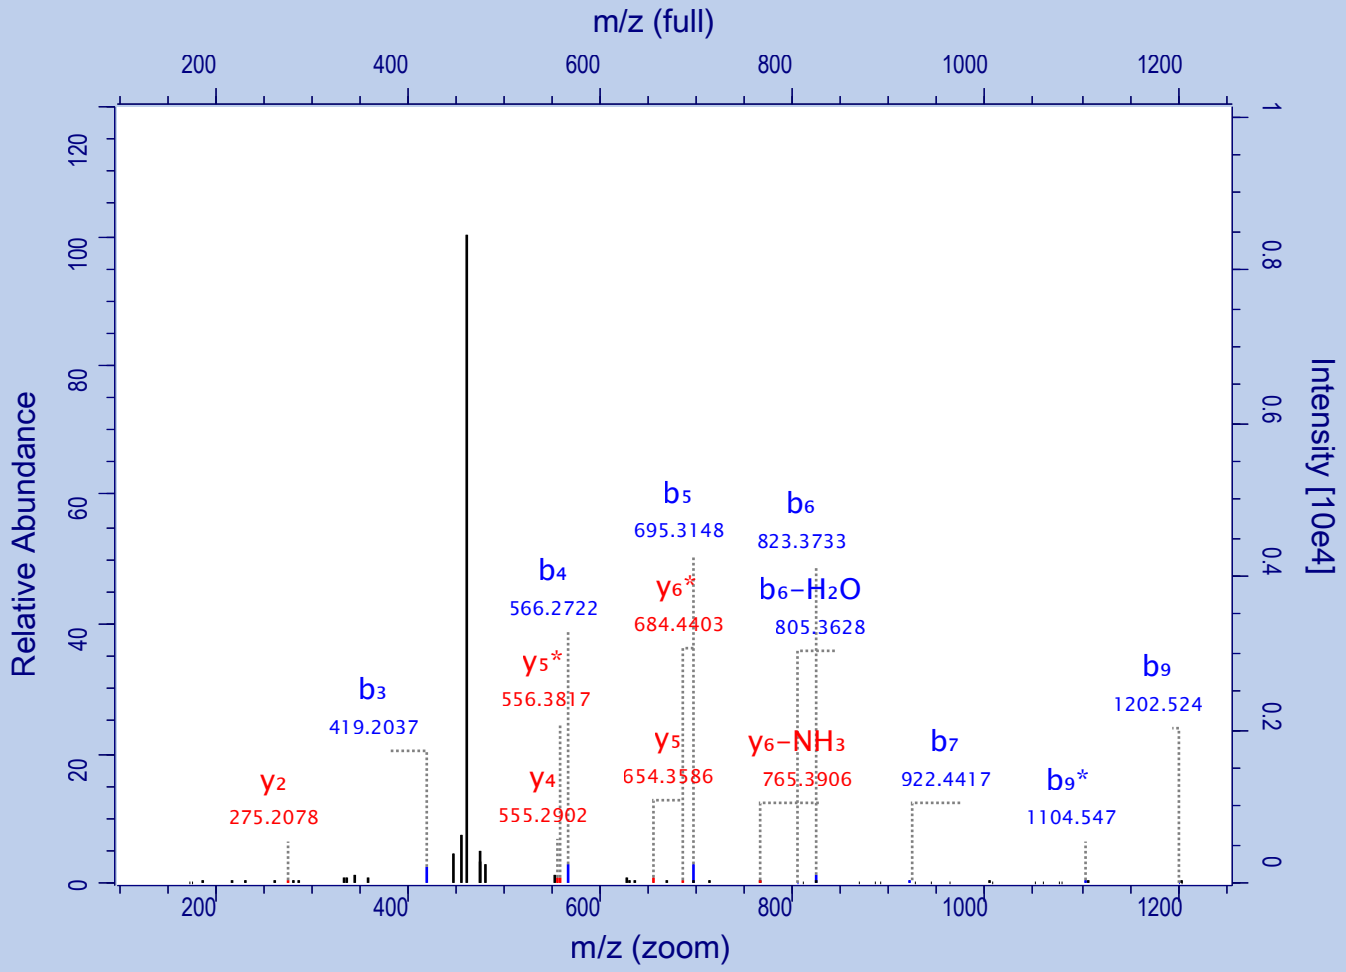

# pSer493

Protein: Q8WYQ5-1; Q8WYQ5; Q53GY5; Q8WYQ5-3; Q8WYQ5  
Score: 123.14  
Source: OT11-1423  
Scannumber: 3838  
Method: ITMS; CID; 2

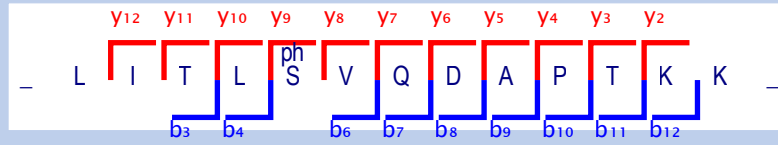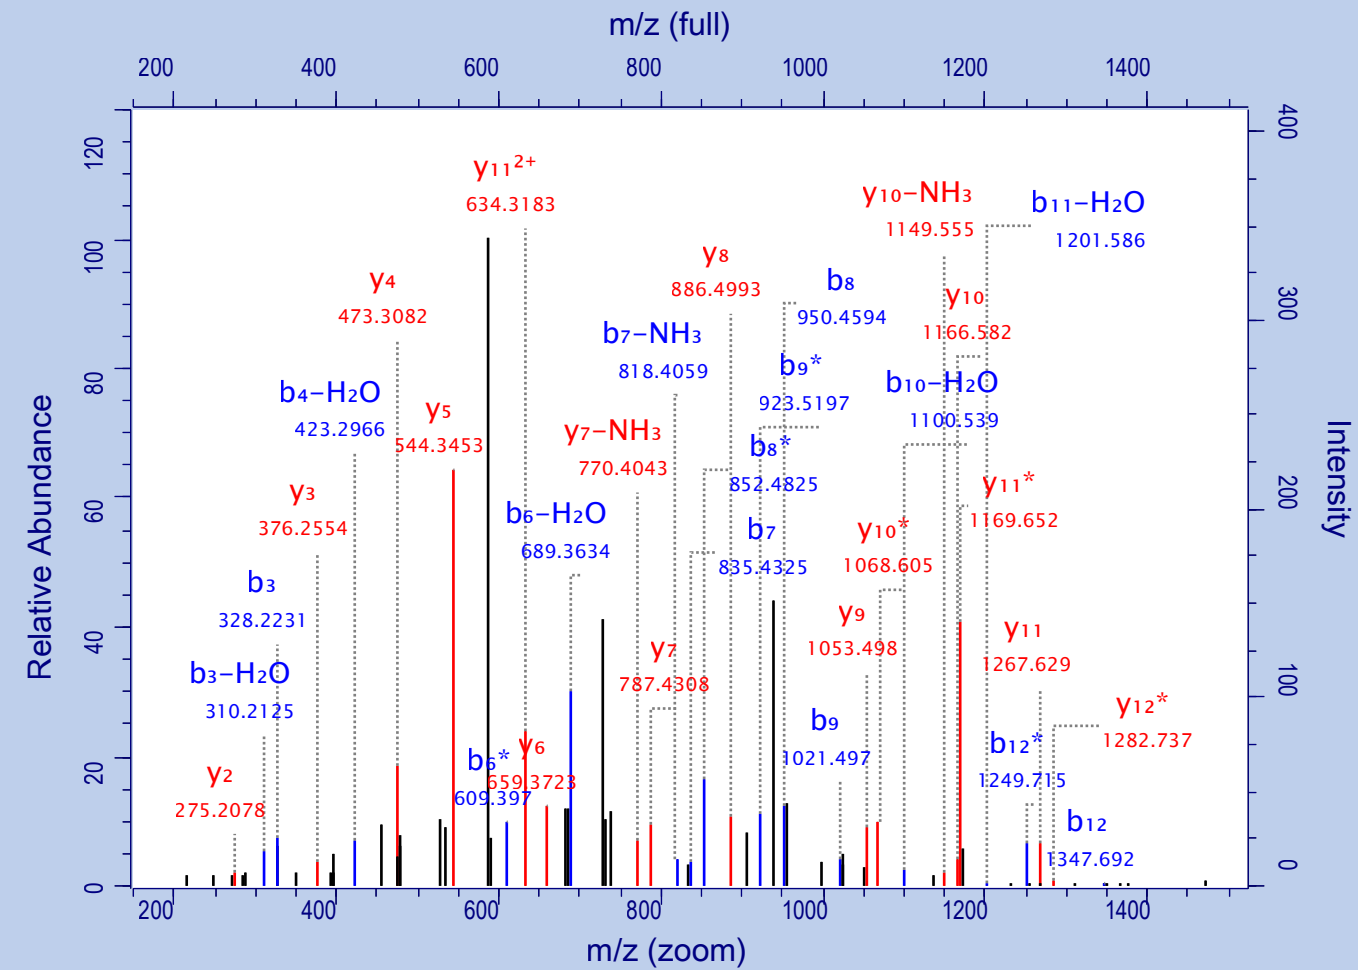

# pSer714

Protein: Q8WYQ5-1; Q8WYQ5; Q53GY5; Q8WYQ5-3; Q8WYQ5  
 Score: 58.92  
 Source: OT11-1423  
 Scannumber: 3808  
 Method: ITMS; CID; 2

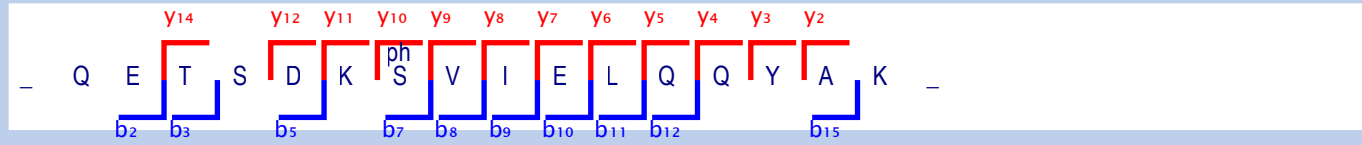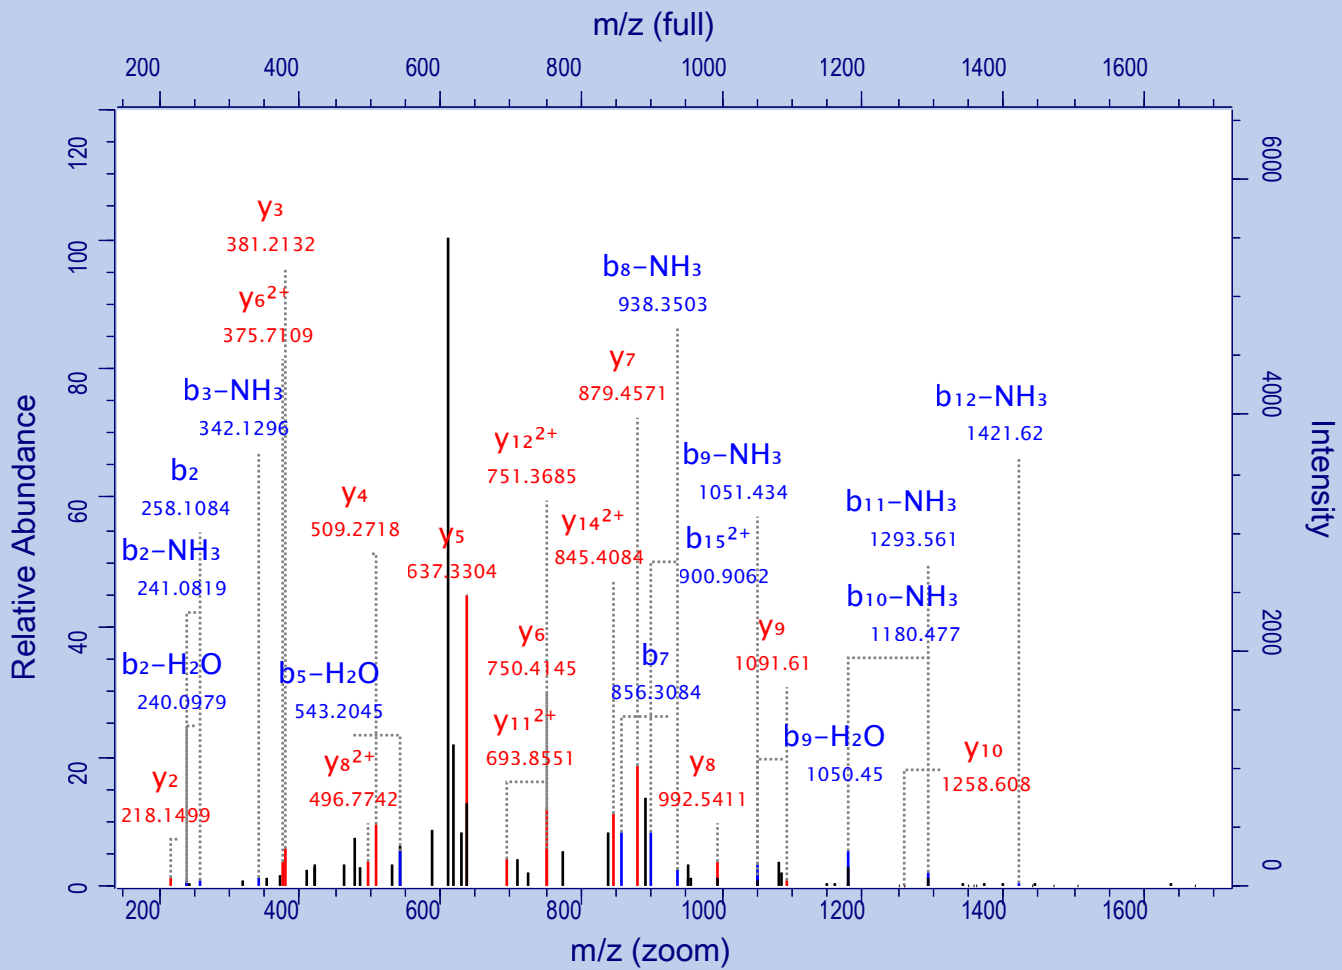

Supplement: NIHMS542053-supplement-3.pdf [file NIHMS542053-supplement-3.pdf]
